# Supplementary material
Source: PubMed Central journal article supplement (PMC5877410)
Supplement: NIHMS888385-supplement-Supplemental.pdf [file NIHMS888385-supplement-Supplemental.pdf]

**Supporting Information:**

**Synthesis and Biological Evaluation of Bile Acid Analogs Inhibitory to  
*Clostridium difficile* Spore Germination**

**Kristen L. Stoltz,<sup>†</sup> Raymond Erickson,<sup>§</sup> Christopher Staley,<sup>§</sup> Alexa R. Weingarden,<sup>§,‡</sup> Erin Romens,<sup>§</sup> Clifford J. Steer,<sup>‡</sup> Alexander Khoruts,<sup>\*,§,‡,◇</sup> Michael J. Sadowsky,<sup>\*,§,θ</sup> Peter I. Dosa<sup>\*,†</sup>**

|                                                                                  |    |
|----------------------------------------------------------------------------------|----|
| Optical Density Graph for 7-UDCA (4b) .....                                      | 2  |
| Synthesis of compound 3 and CDCA analog 11a.....                                 | 2  |
| Optical Density Graphs for Bile Acid Analogs.....                                | 6  |
| Phase-Contrast Microscopy Assay Data for Compounds at 10 $\mu$ M .....           | 27 |
| Phase-contrast Microscopy Assay Data for Selected Compounds at 50 $\mu$ M.....   | 32 |
| Kinetic Analysis of Spore Germination in the Presence of Selected Compounds..... | 34 |
| References.....                                                                  | 54 |

## Optical Density Graph for 7-UDCA (4b)

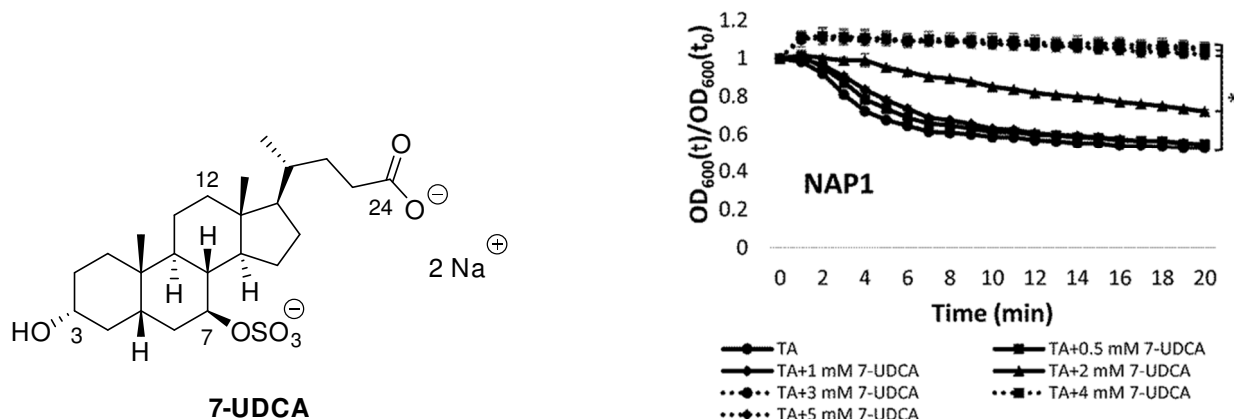

**Figure S1:** The relative OD<sub>600</sub> of spores after 20 min. exposure to 2 mM TCA with 0 mM, 0.5 mM, 1 mM, 2 mM, 3 mM, 4 mM, or 5 mM 7-UDCA. \**P* < 0.01. TCA indicates taurocholate; 7-UDCA, C7-sulfated UDCA.

## Synthesis of compound 3 and CDCA analog 11a.

### Scheme S1: Synthesis of 3.<sup>a</sup>

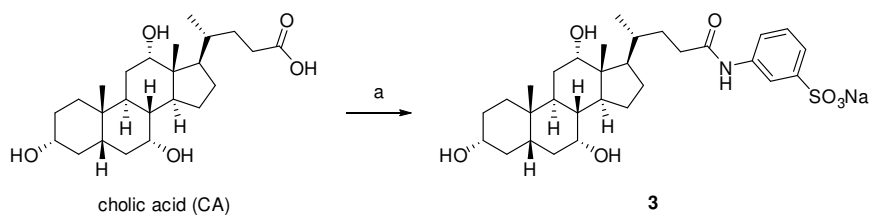

<sup>a</sup>Reagents and conditions: HATU, TEA, 3-aminobenzenesulfonic acid, DCM, THF, then ion-exchange using Na<sup>+</sup>-Dowex resin.

*Sodium* 3-((*R*)-4-((3*R*,5*S*,7*R*,8*R*,9*S*,10*S*,12*S*,13*R*,14*S*,17*R*)-3,7,12-trihydroxy-10,13-dimethylhexadecahydro-1*H*-cyclopenta[*a*]phenanthren-17-yl)pentanamido)benzenesulfonate

(3): To a solution of cholic acid (1.00 g, 2.45 mmol) in a mixture of DCM (5.4 mL) and THF

(2.7 mL) was added HATU (0.977 g, 2.57 mmol) and 3-aminobenzenesulfonic acid (0.424 g, 2.45 mmol). The reaction was stirred at room temperature for 18 h. and the solvent was removed under reduced pressure. A portion of the material was dissolved in DMSO (0.5 mL) and 1M triethylammonium acetate buffer (0.1 mL) and purified by flash column chromatography (5-100% 20 mM triethylammonium acetate buffer in acetonitrile in water as eluent, C<sub>18</sub> column) to yield a white solid after lyophilization. To prepare the sodium salt of **3**, a 1 cm wide column was filled with 12 cm of Dowex-50 WX2 (50-100 mesh, strongly acidic) ion-exchange resin. The column was prepared by sequentially washing with 1:1 acetonitrile/water, ~1 M aqueous NaHCO<sub>3</sub> (caution: gas evolution), water, and finally 1:1 acetonitrile/water. The reaction product was dissolved in 1:1 acetonitrile/water and loaded onto the column, which was eluted with 1:1 acetonitrile/water. The fractions containing the product were lyophilized to furnish **3** as an off-white solid. <sup>1</sup>H NMR (400 MHz, CD<sub>3</sub>OD) δ 7.98 (t, J = 1.9 Hz, 1H), 7.78 (dd, J = 8.2, 2.1 Hz, 1H), 7.56 (d, J = 7.7 Hz, 1H), 7.37 (t, J = 8.0 Hz, 1H), 3.97 (d, J = 3.1 Hz, 1H), 3.81 (q, J = 3.0 Hz, 1H), 3.38 (tt, J = 11.3, 4.4 Hz, 1H), 2.46 (ddd, J = 14.2, 9.8, 4.4 Hz, 1H), 2.30 (tdd, J = 18.2, 10.4, 6.2 Hz, 3H), 2.13 – 1.25 (m, 18H), 1.19 – 1.10 (m, 1H), 1.08 (d, J = 5.9 Hz, 3H), 1.04 – 0.94 (m, 1H), 0.93 (s, 3H), 0.73 (s, 3H). <sup>13</sup>C NMR (100 MHz, CD<sub>3</sub>OD) δ 175.3, 146.8, 140.0, 129.7, 122.7, 122.3, 118.6, 74.0, 72.9, 69.0, 48.0, 47.5, 43.2, 43.0, 41.0, 40.4, 36.9, 36.5, 35.9, 35.8, 35.0, 33.1, 31.2, 29.6, 28.7, 27.8, 24.2, 23.2, 17.8, 13.0. HRMS (ESI): m/z calcd. C<sub>30</sub>H<sub>44</sub>NNa<sub>2</sub>O<sub>7</sub>S (M+Na)<sup>+</sup> 608.2634 found 608.2647.

## Scheme S2: Synthesis of 11a.<sup>a</sup>

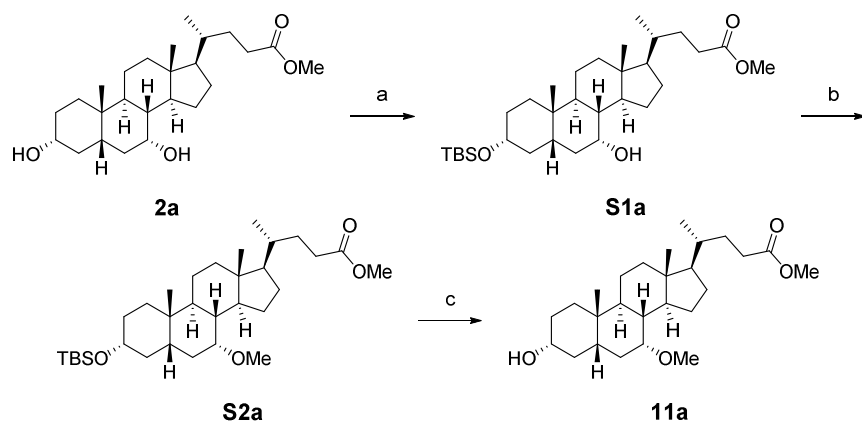

<sup>a</sup>Reagents and conditions: (a) TBSCl, imidazole, DMF; (b) MeOTf, 2,6-lutidine, DCM; (c) TBAF, THF.

*Methyl (R)-4-((3R,5R,7R,8R,9S,10S,13R,14S,17R)-3-((tert-butyldimethylsilyl)oxy)-7-hydroxy-10,13-dimethylhexadecahydro-1H-cyclopenta[a]phenanthren-17-yl)pentanoate (S1a)*: To a solution of **2a** (0.495 g, 1.21 mmol) in DMF (1 mL) was added imidazole (0.398 g, 5.84 mmol) and TBSCl (0.229 g, 1.52 mmol). The reaction mixture stirred at room temperature for 1 h. and was poured into a separatory funnel containing ice water. The aqueous layer was extracted with EtOAc (3 x), and the combined organic layers were washed with water (5 x), dried over MgSO<sub>4</sub>, filtered, and concentrated. The crude material was purified by flash column chromatography on silica gel (0-25% EtOAc in DCM as eluent) to obtain the silyl ether as a white foam (0.471 g, 74 % yield). <sup>1</sup>H NMR (400 MHz, CDCl<sub>3</sub>) δ 3.84 (p, J = 3.2 Hz, 1H), 3.67 (s, 3H), 3.44 (tt, J = 10.9, 4.5 Hz, 1H), 2.36 (ddd, J = 15.2, 10.1, 5.1 Hz, 1H), 2.30 – 2.14 (m, 2H), 2.02 – 1.02 (m, 22H), 0.97 (dd, J = 14.4, 3.7 Hz, 1H), 0.93 (d, J = 6.4 Hz, 3H), 0.89 (s, 3H), 0.89 (s, 9H), 0.66 (s, 3H), 0.05 (s, 6H). <sup>13</sup>C NMR (100 MHz, CDCl<sub>3</sub>) δ 174.9, 73.0, 68.7, 55.9, 51.6, 50.6, 42.8, 41.7, 40.2,

39.8, 39.6, 35.7, 35.5, 35.2, 34.8, 32.9, 31.2, 31.2, 31.1, 28.3, 26.1, 26.1, 26.1, 23.9, 23.0, 20.7, 18.4, 18.4, 11.9, -4.4, -4.5.

*Methyl (R)-4-((3R,5R,7R,8R,9S,10S,13R,14S,17R)-3-((tert-butyldimethylsilyl)oxy)-7-methoxy-10,13-dimethylhexadecahydro-1H-cyclopenta[a]phenanthren-17-yl)pentanoate (S2a)*: To a solution of **S1α** (0.471 g, 0.904 mmol) and 2,6-lutidine (0.41 ml, 1.8 mmol) in DCM (9 ml) was added methyl triflate (0.11 ml, 0.95 mmol) and the reaction mixture stirred at room temperature for 12 h. The reaction mixture was quenched by the addition of water and stirred for 15 min. The aqueous layer was extracted with DCM (3 x 15 mL) and the combined organic layers were dried over MgSO<sub>4</sub>, filtered, and concentrated. The crude material was purified by flash column chromatography on silica gel (0-20% EtOAc in DCM as eluent) to obtain **S2a** (0.057 g, 12% yield). <sup>1</sup>H NMR (400 MHz, CDCl<sub>3</sub>) δ 3.66 (s, 3H), 3.42 (tt, J = 10.9, 4.5 Hz, 1H), 3.24 (s, 3H), 3.17 (q, J = 2.9 Hz, 1H), 2.35 (ddd, J = 15.2, 10.2, 5.0 Hz, 1H), 2.29 – 2.12 (m, 2H), 1.99 – 0.93 (m, 22H), 0.94 – 0.92 (m, 1H), 0.91 (d, J = 6.3 Hz, 3H), 0.88 (s, 3H), 0.88 (s, 9H), 0.63 (s, 3H), 0.04 (s, 6H). <sup>13</sup>C NMR (100 MHz, CDCl<sub>3</sub>) δ 174.9, 77.5, 77.4, 73.0, 55.9, 55.8, 51.6, 50.4, 42.6, 42.2, 39.7, 39.6, 38.8, 35.7, 35.5, 35.1, 33.8, 31.2, 31.2, 31.1, 28.3, 28.0, 26.1, 26.1, 26.1, 23.8, 23.1, 21.0, 18.4, 18.4, 11.8, -4.3.

*Methyl (R)-4-((3R,5S,7R,8R,9S,10S,13R,14S,17R)-3-hydroxy-7-methoxy-10,13-dimethylhexadecahydro-1H-cyclopenta[a]phenanthren-17-yl)pentanoate (11a)*: To a solution of **S2a** (0.052 g, 0.097 mmol) in THF (1 mL) was added TBAF (0.11 ml, 0.11 mmol). The reaction stirred at room temperature for 24 h. and was concentrated under reduced pressure. The crude material was purified by flash column chromatography on silica gel (33% EtOAc in DCM) to obtain **11α** (0.030 g, 73% yield) as a colorless oil. <sup>1</sup>H NMR (400 MHz, DMSO-D<sub>6</sub>) δ 4.34 (d, J = 4.8 Hz, 1H), 3.57 (s, 3H), 3.22 – 3.12 (m, 2H), 3.17 (s, 3H), 2.33 (ddd, J = 15.2, 9.6, 5.2 Hz, 1H),

2.20 (ddd, J = 15.8, 9.3, 6.9 Hz, 1H), 2.06 – 0.96 (m, 23H), 0.87 (d, J = 6.6 Hz, 3H), 0.85 (s, 3H), 0.60 (s, 3H). <sup>1</sup>H NMR (400 MHz, CDCl<sub>3</sub>) δ 3.67 (s, 3H), 3.44 (tt, J = 10.8, 4.6 Hz, 1H), 3.26 (s, 3H), 3.19 (d, J = 2.9 Hz, 1H), 2.35 (ddd, J = 15.3, 10.2, 5.0 Hz, 1H), 2.30 – 2.07 (m, 2H), 2.02 – 0.95 (m, 23H), 1.00 – 0.93 (m, 1H), 0.92 (d, J = 7.4 Hz, 3H), 0.91 (s, 3H), 0.64 (s, 3H). <sup>13</sup>C NMR (100 MHz, CDCl<sub>3</sub>) δ 174.9, 77.7, 77.4, 72.2, 56.1, 55.9, 51.6, 50.4, 42.6, 42.1, 39.7, 39.5, 38.7, 35.5, 35.5, 35.1, 33.9, 31.1, 31.0, 28.3, 28.0, 23.8, 23.0, 21.0, 18.4, 11.8. TLC-MS (ESI): m/z calcd. C<sub>25</sub>H<sub>40</sub>O<sub>3</sub> (M-CH<sub>3</sub>OH)<sup>-</sup> 388.3, found 388.3.

### Optical Density Graphs for Bile Acid Analogs

$OD_{600}(t)/OD_{600}(t_0) = OD_{600}$  normalized to the initial  $OD_{600}$  (relative  $OD_{600}$ ). Data represent mean  $\pm$  SEM for all graphs. Optical density data for **1b** was previously reported in Weingarden et al.<sup>1</sup> In some examples, compound **20b** was used as a positive control.

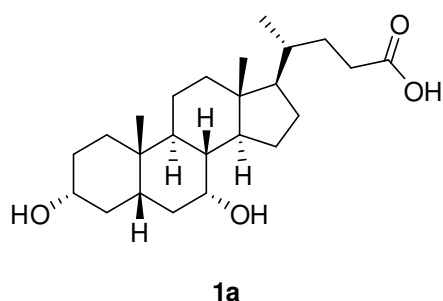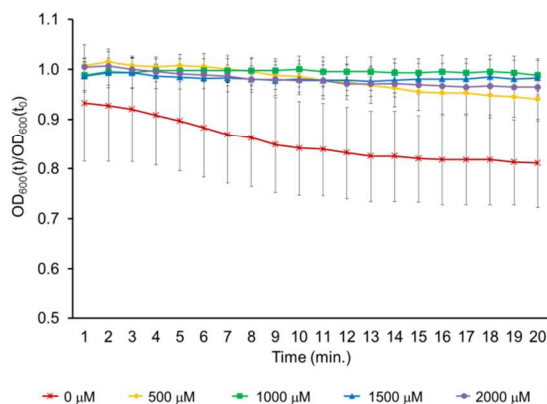

**Figure S2:** The relative  $OD_{600}$  of spores in BHIS after 20 min. exposure to 2000  $\mu$ M TCA and 0  $\mu$ M, 500  $\mu$ M, 1000  $\mu$ M, 1500  $\mu$ M, or 2000  $\mu$ M **1a**.

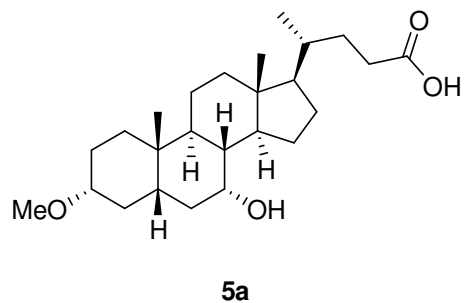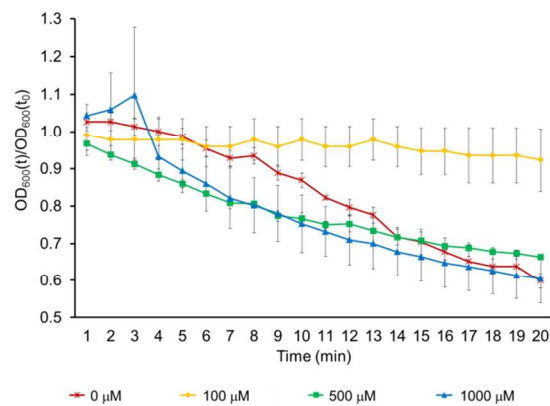

**Figure S3:** The relative OD<sub>600</sub> of spores in BHIS after 20 min. exposure to 2000 μM TCA and 0 μM, 100 μM, 500 μM, or 1000 μM **5a**.

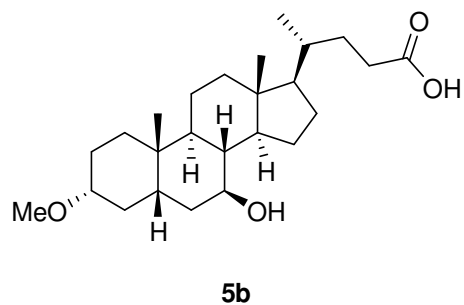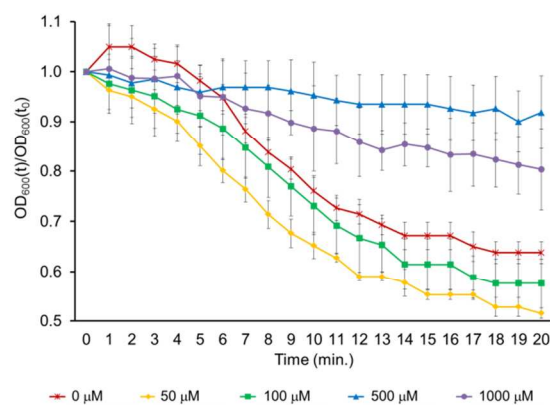

**Figure S4:** The relative OD<sub>600</sub> of spores in BHIS after 20 min. exposure to 2000 μM TCA and 0 μM, 50 μM, 100 μM, 500 μM or 1000 μM **5b**.

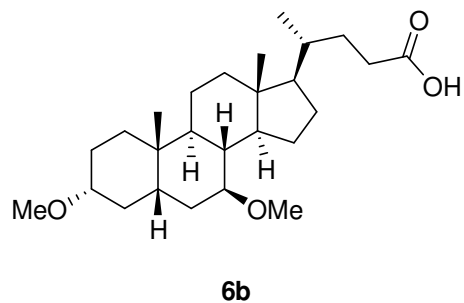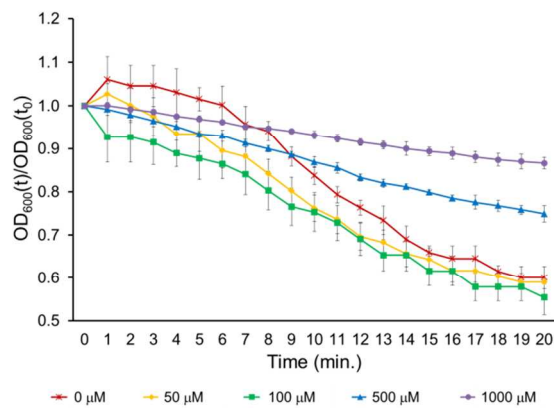

**Figure S5:** The relative OD<sub>600</sub> of spores in BHIS after 20 min. exposure to 2000 μM TCA and 0 μM, 50 μM, 100 μM, 500 μM or 1000 μM **6b**.

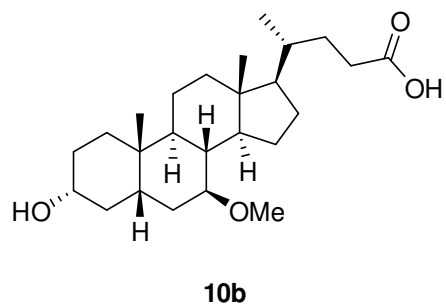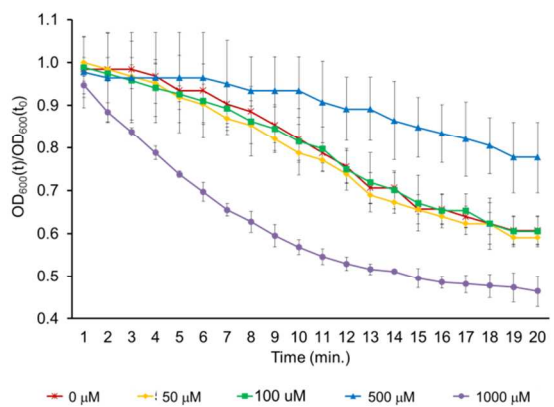

**Figure S6:** The relative OD<sub>600</sub> of spores in BHIS after 20 min. exposure to 2000 μM TCA and 0 μM, 50 μM, 100 μM, 500 μM or 1000 μM **10b**.



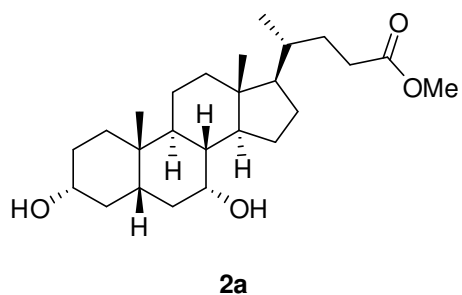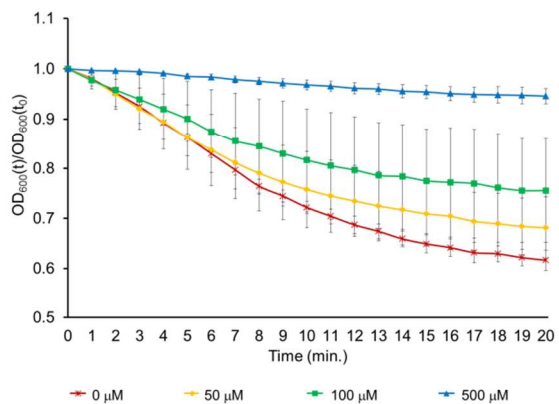

**Figure S7:** The relative OD<sub>600</sub> of spores in BHIS after 20 min. exposure to 2000 μM TCA and 0 μM, 50 μM, 100 μM, or 500 μM **2a**.

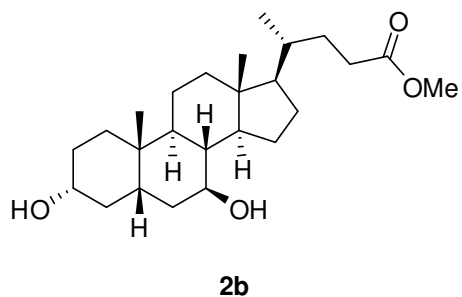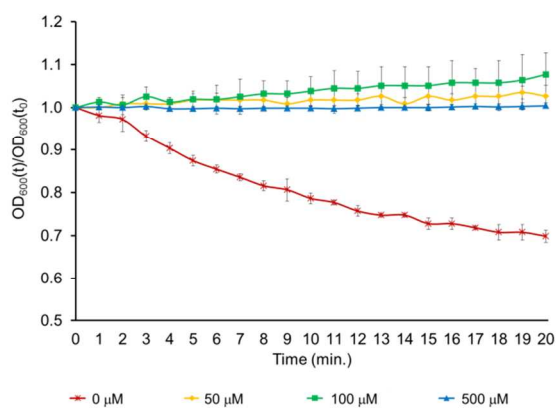

**Figure S8:** The relative OD<sub>600</sub> of spores in BHIS after 20 min. exposure to 2000 μM TCA and 0 μM, 50 μM, 100 μM, or 500 μM **2b**.

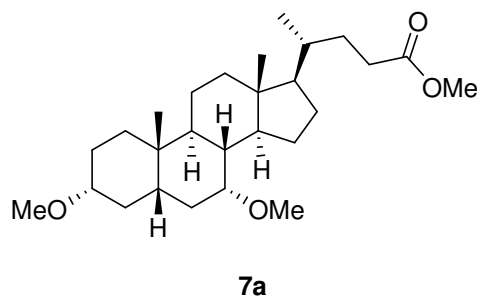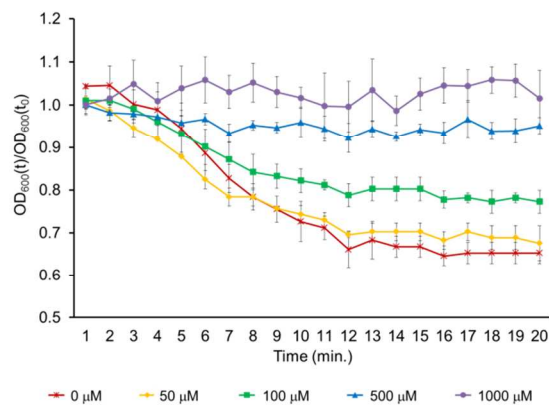

**Figure S9:** The relative OD<sub>600</sub> of spores in BHIS after 20 min. exposure to 2000 μM TCA and 0 μM, 50 μM, 100 μM, 500 μM, or 1000 μM **7a**.

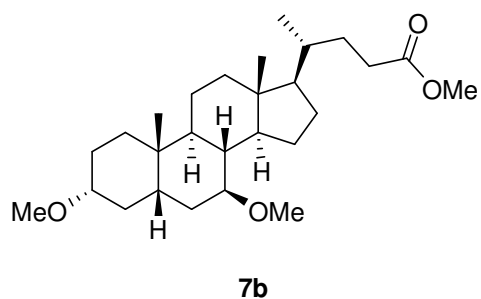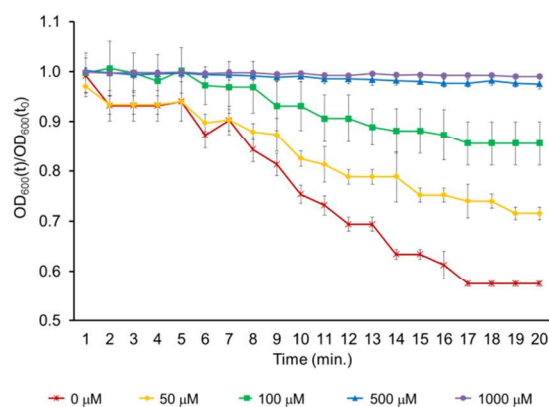

**Figure S10:** The relative OD<sub>600</sub> of spores in BHIS after 20 min. exposure to 2000 μM TCA and 0 μM, 50 μM, 100 μM, 500 μM, or 1000 μM **7b**.

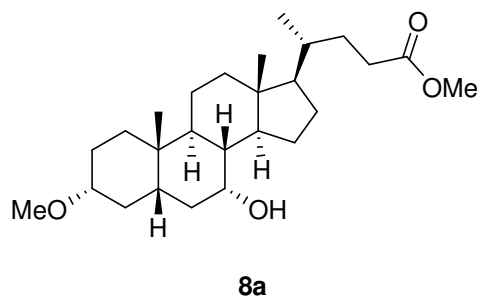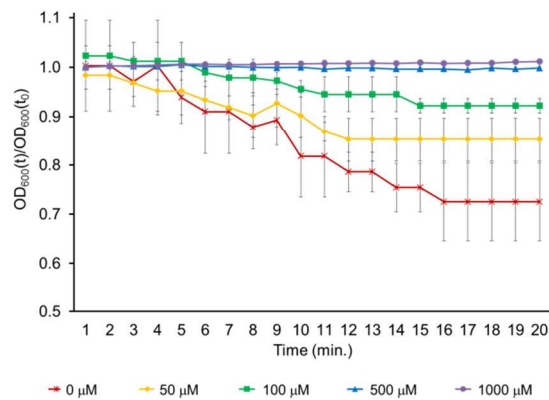

**Figure S11:** The relative OD<sub>600</sub> of spores in BHIS after 20 min. exposure to 2000 μM TCA and 0 μM, 50 μM, 100 μM, 500 μM, or 1000 μM **8a**.

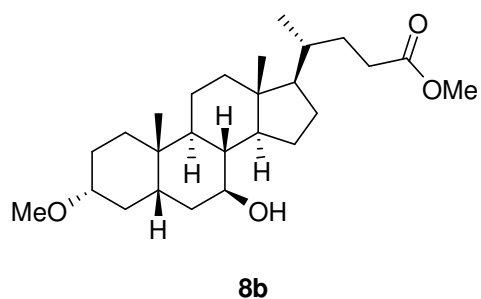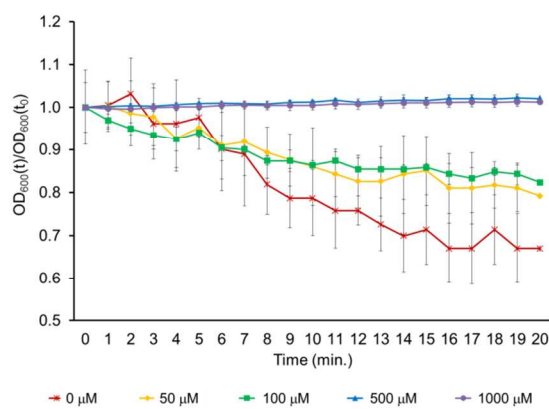

**Figure S12:** The relative OD<sub>600</sub> of spores in BHIS after 20 min. exposure to 2000 μM TCA and 0 μM, 50 μM, 100 μM, 500 μM, or 1000 μM **8b**.

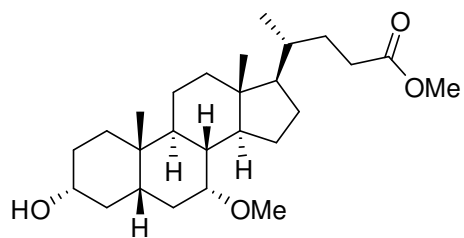

**11a**

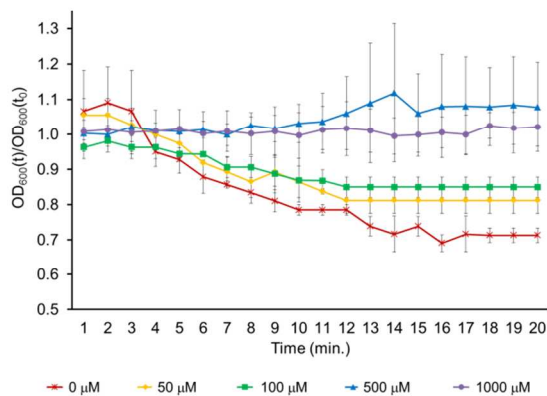

**Figure S13:** The relative OD<sub>600</sub> of spores in BHIS after 20 min. exposure to 2000 μM TCA and 0 μM, 50 μM, 100 μM, 500 μM, or 1000 μM **11a**.

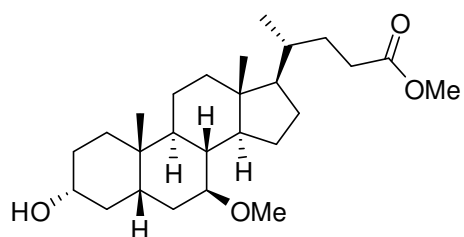

**11b**

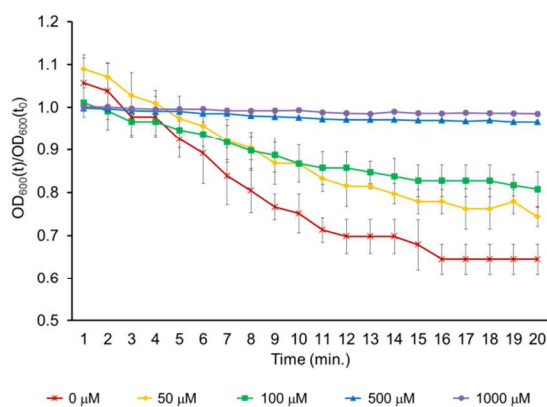

**Figure S14:** The relative OD<sub>600</sub> of spores in BHIS after 20 min. exposure to 2000 μM TCA and 0 μM, 50 μM, 100 μM, 500 μM, or 1000 μM **11b**.

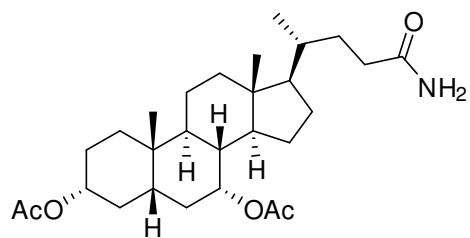

**16a**

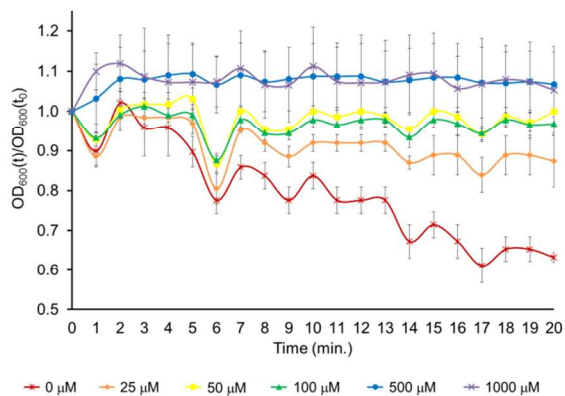

**Figure S15:** The relative OD<sub>600</sub> of spores in BHIS after 20 min. exposure to 2000 μM TCA and 0 μM, 25 μM, 50 μM, 100 μM, 500 μM, or 1000 μM **16a**.

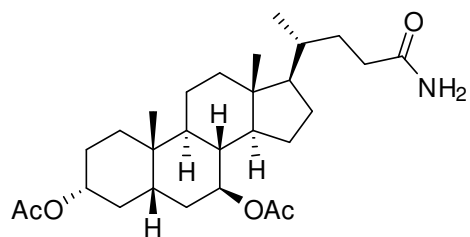

**16b**

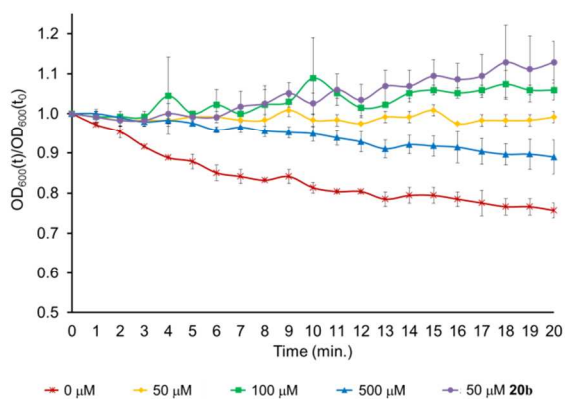

**Figure S16:** The relative OD<sub>600</sub> of spores in BHIS after 20 min. exposure to 2000 μM TCA and 0 μM **16b** 50 μM **16b**, 100 μM **16b**, 500 μM **16b**, or 50 μM **20b**.

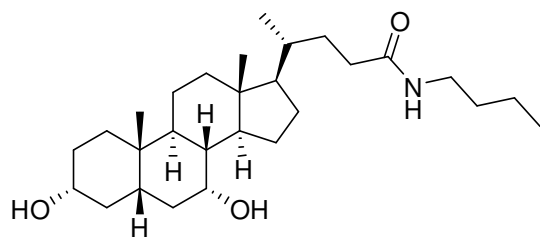

**17a**

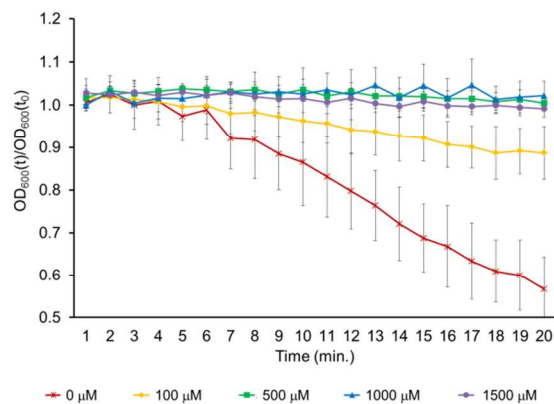

**Figure S17:** The relative OD<sub>600</sub> of spores in BHIS after 20 min. exposure to 2000 μM TCA and 0 μM, 100 μM, 500 μM, 1000 μM, or 1500 μM **17a**.

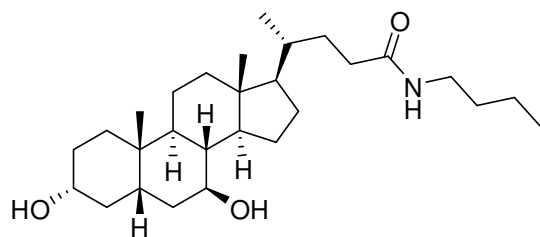

**17b**

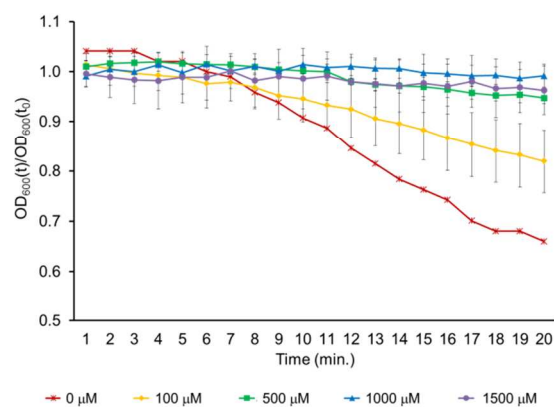

**Figure S18:** The relative OD<sub>600</sub> of spores in BHIS after 20 min. exposure to 2000 μM TCA and 0 μM, 100 μM, 500 μM, 1000 μM, or 1500 μM **17b**.

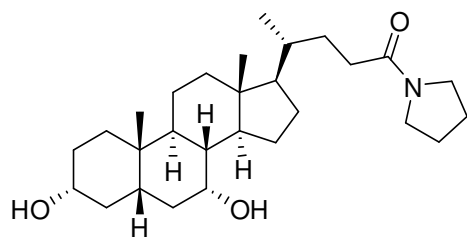

**18a**

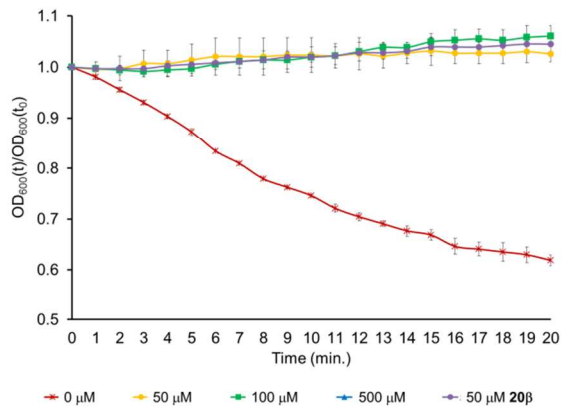

**Figure S19:** The relative OD<sub>600</sub> of spores in BHIS after 20 min. exposure to 2000 μM TCA and 0 μM **18a**, 50 μM **18a**, 100 μM **18a**, 500 μM **18a**, or 50 μM **20b**.

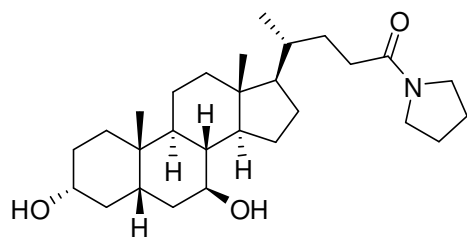

**18b**

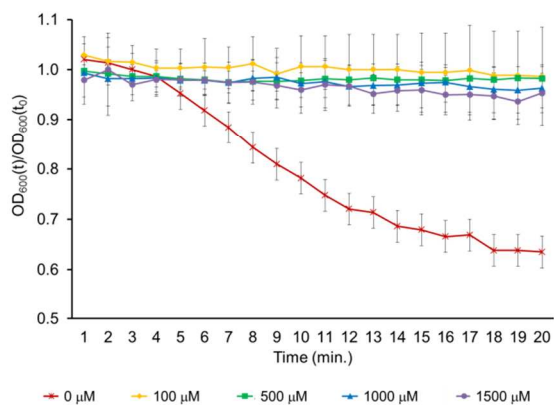

**Figure S20:** The relative OD<sub>600</sub> of spores in BHIS after 20 min. exposure to 2000 μM TCA and 0 μM, 100 μM, 500 μM, 1000 μM, or 1500 μM **18a**.

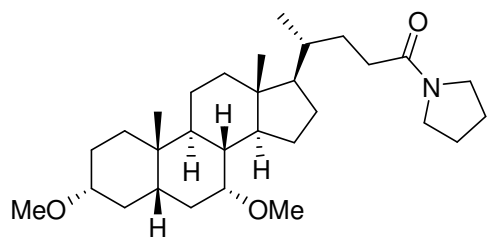

**19a**

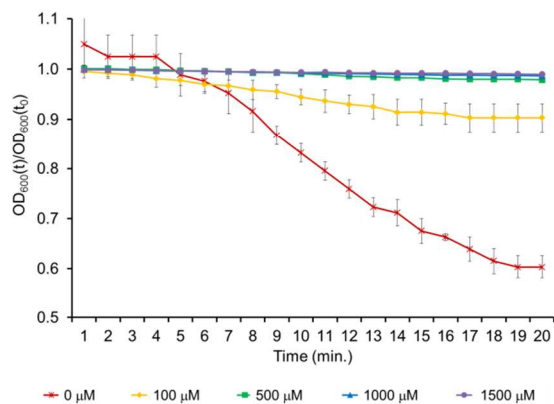

**Figure S21:** The relative OD<sub>600</sub> of spores in BHIS after 20 min. exposure to 2000 μM TCA and 0 μM, 100 μM, 500 μM, 1000 μM, or 1500 μM **19a**.

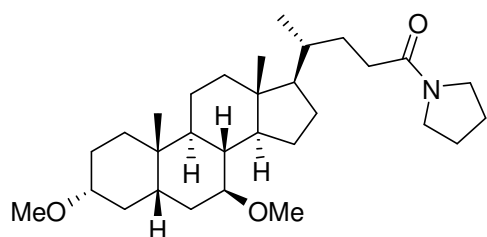

**19b**

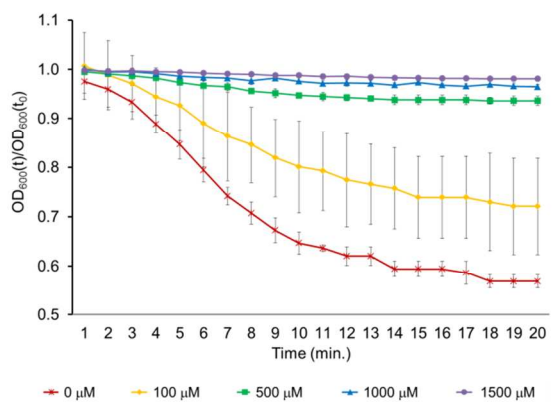

**Figure S22:** The relative OD<sub>600</sub> of spores in BHIS after 20 min. exposure to 2000 μM TCA and 0 μM, 100 μM, 500 μM, 1000 μM, or 1500 μM **19b**.



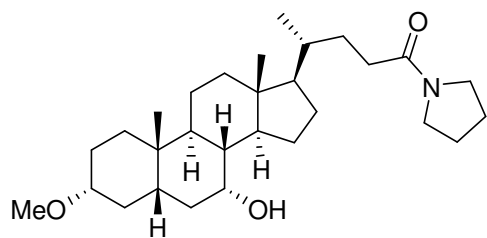

**20a**

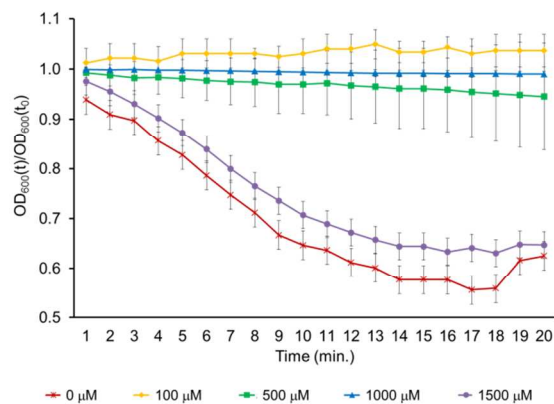

**Figure S23:** The relative  $OD_{600}$  of spores in BHIS after 20 min. exposure to 2000  $\mu\text{M}$  TCA and 0  $\mu\text{M}$ , 100  $\mu\text{M}$ , 500  $\mu\text{M}$ , 1000  $\mu\text{M}$ , or 1500  $\mu\text{M}$  **20a**.

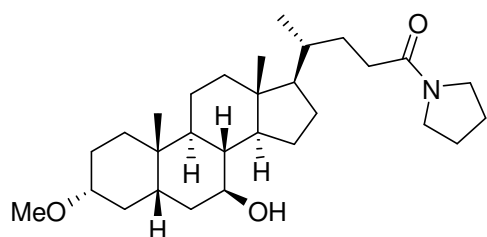

**20b**

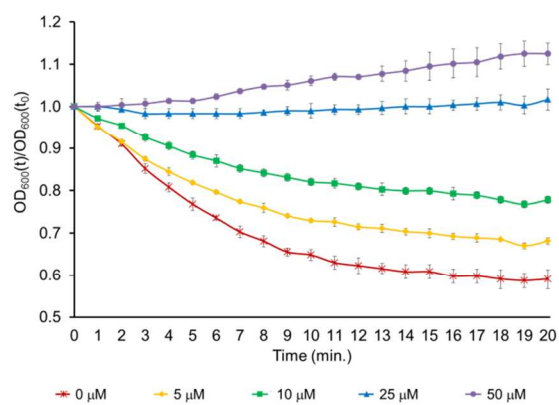

**Figure S24:** The relative  $OD_{600}$  of spores in BHIS after 20 min. exposure to 2000  $\mu\text{M}$  TCA and 0  $\mu\text{M}$ , 5  $\mu\text{M}$ , 10  $\mu\text{M}$ , 25  $\mu\text{M}$ , or 50  $\mu\text{M}$  **20b**.

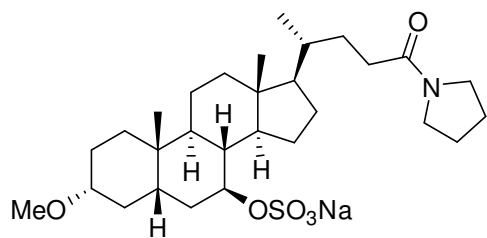

**21b**

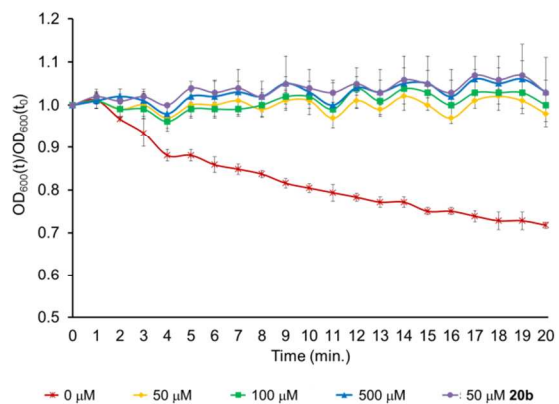

**Figure S25:** The relative OD<sub>600</sub> of spores in BHIS after 20 min. exposure to 2000  $\mu$ M TCA and 0  $\mu$ M **21b**, 50  $\mu$ M **21b**, 100  $\mu$ M **21b**, 500  $\mu$ M **21b**, or 50  $\mu$ M **20b**.

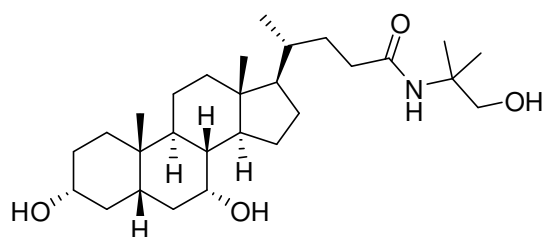

**22a**

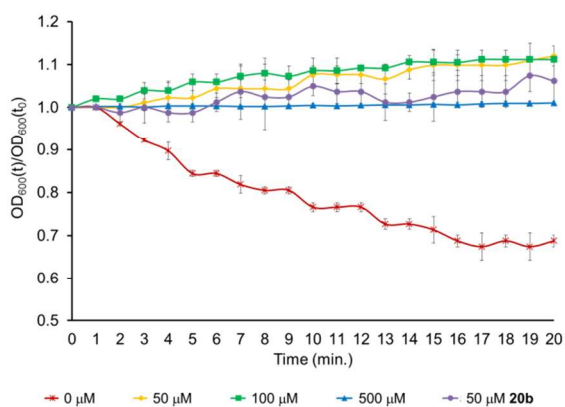

**Figure S26:** The relative OD<sub>600</sub> of spores in BHIS after 20 min. exposure to 2000  $\mu$ M TCA and 0  $\mu$ M **22a**, 50  $\mu$ M **22a**, 100  $\mu$ M **22a**, 500  $\mu$ M **22a**, or 50  $\mu$ M **20b**.

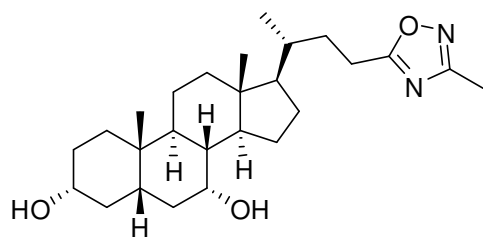

**24a**

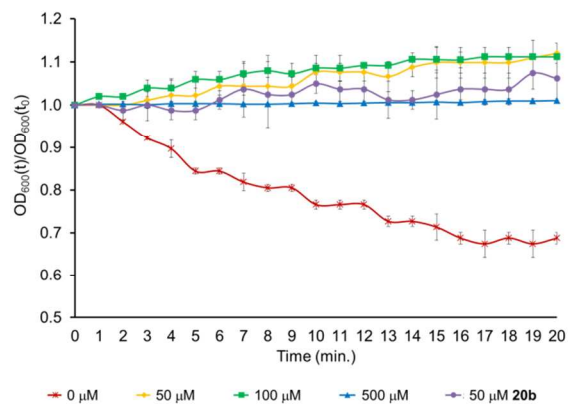

**Figure S27:** The relative OD<sub>600</sub> of spores in BHIS after 20 min. exposure to 2000 μM TCA and 0 μM **24a**, 50 μM **24a**, 100 μM **24a**, 500 μM **24a**, or 50 μM **20b**.

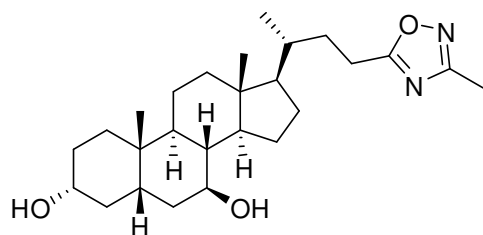

**24b**

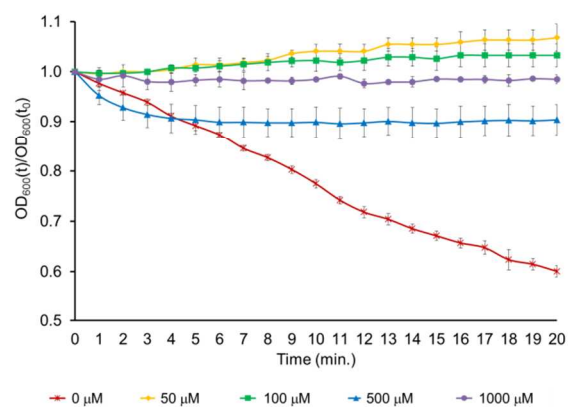

**Figure S28:** The relative OD<sub>600</sub> of spores in BHIS after 20 min. exposure to 2000 μM TCA and 0 μM, 50 μM, 100 μM, 500 μM, or 1000 μM **24b**.

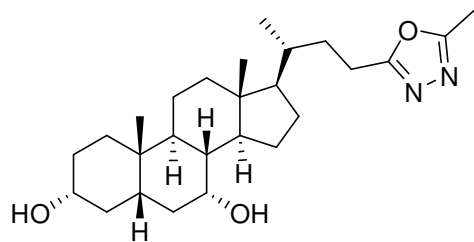

**27a**

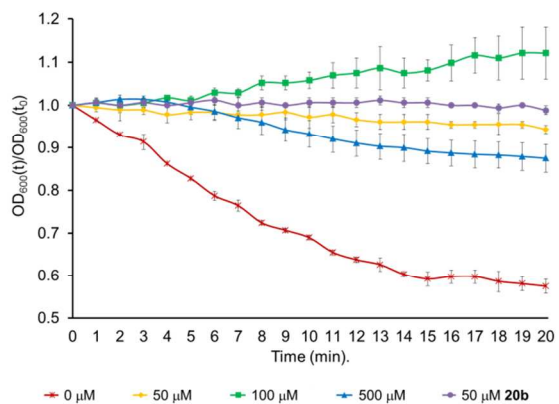

**Figure S29:** The relative OD<sub>600</sub> of spores in BHIS after 20 min. exposure to 2000 μM TCA and 0 μM **27a**, 50 μM **27a**, 100 μM **27a**, 500 μM **27a**, or 50 μM **20b**.

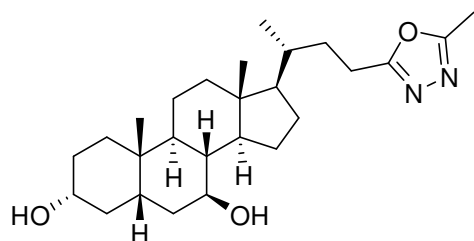

**27b**

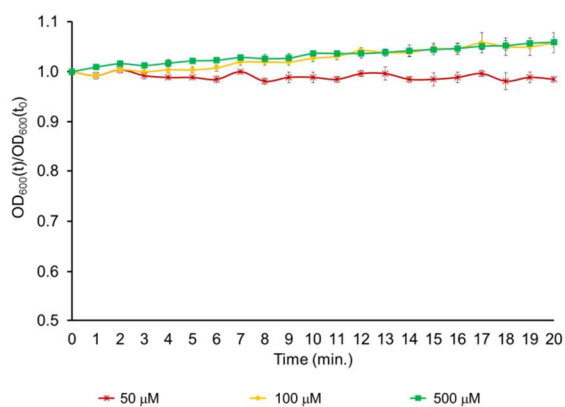

**Figure S30:** The relative OD<sub>600</sub> of spores in BHIS after 20 min. exposure to 2000 μM TCA and 50 μM, 100 μM, or 500 μM **27b**.

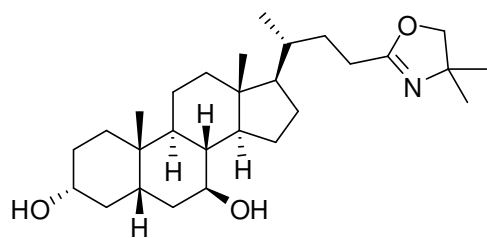

**31b**

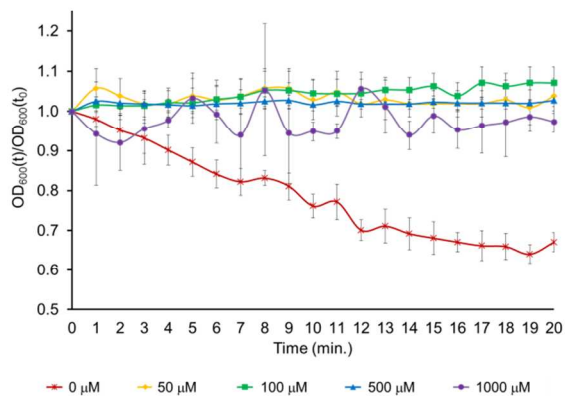

**Figure S31:** The relative  $OD_{600}$  of spores in BHIS after 20 min. exposure to 2000  $\mu\text{M}$  TCA and 0  $\mu\text{M}$ , 50  $\mu\text{M}$ , 100  $\mu\text{M}$ , 500  $\mu\text{M}$ , or 1000  $\mu\text{M}$  **31b**.

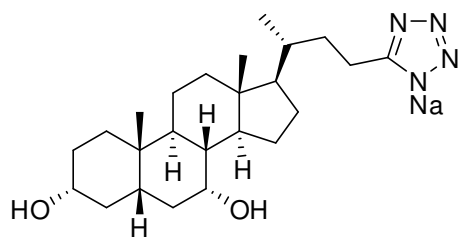

**35a**

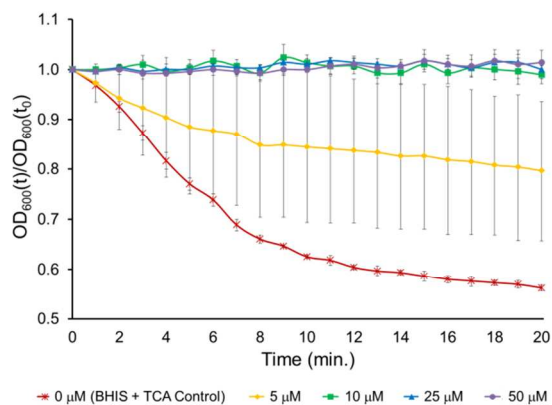

**Figure S32:** The relative  $OD_{600}$  of spores in BHIS after 20 min. exposure to 2000  $\mu\text{M}$  TCA and 0  $\mu\text{M}$ , 5  $\mu\text{M}$ , 10  $\mu\text{M}$ , 25  $\mu\text{M}$ , or 50  $\mu\text{M}$  **35a**.

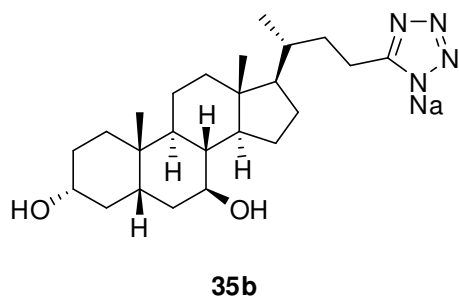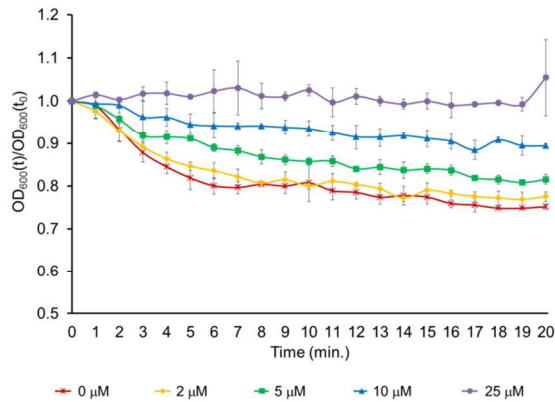

**Figure S33:** The relative OD<sub>600</sub> of spores in BHIS after 20 min. exposure to 2000 μM TCA and 0 μM, 2 μM, 5 μM, 10 μM, or 25 μM **35b**.

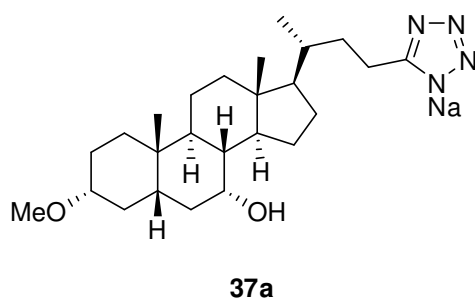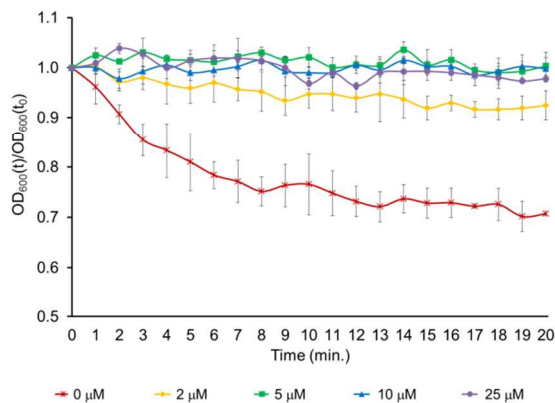

**Figure S34:** The relative OD<sub>600</sub> of spores in BHIS after 20 min. exposure to 2000 μM TCA and 0 μM, 2 μM, 5 μM, 10 μM, or 25 μM **37a**.

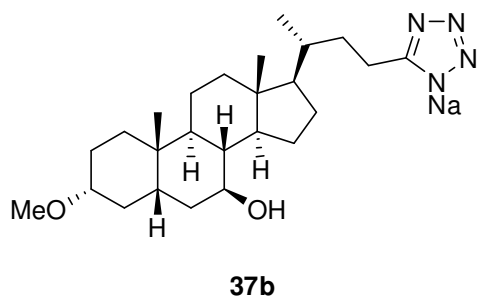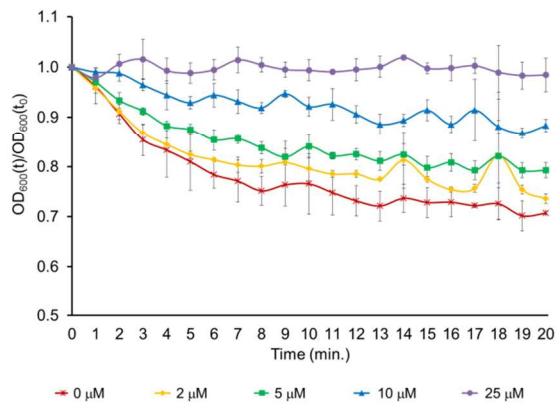

**Figure S35:** The relative OD<sub>600</sub> of spores in BHIS after 20 min. exposure to 2000 μM TCA and 0 μM, 2 μM, 5 μM, 10 μM, or 25 μM **37b**.

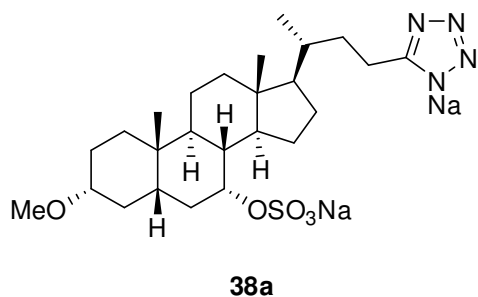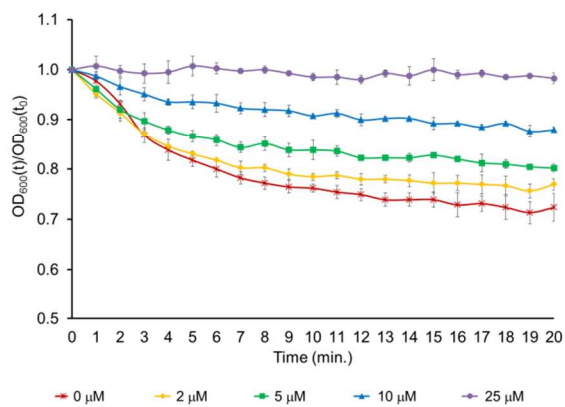

**Figure S36:** The relative OD<sub>600</sub> of spores in BHIS after 20 min. exposure to 2000 μM TCA and 0 μM, 2 μM, 5 μM, 10 μM, or 25 μM **38a**.

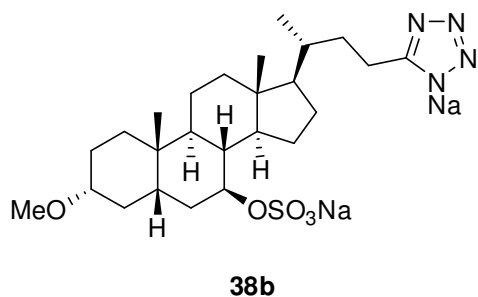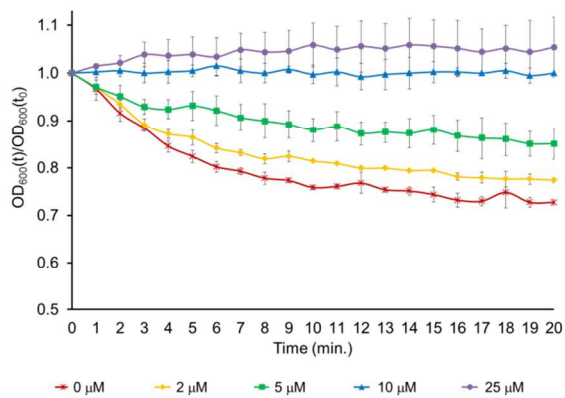

**Figure S37:** The relative OD<sub>600</sub> of spores in BHIS after 20 min. exposure to 2000 μM TCA and 0 μM, 2 μM, 5 μM, 10 μM, or 25 μM **38b**.

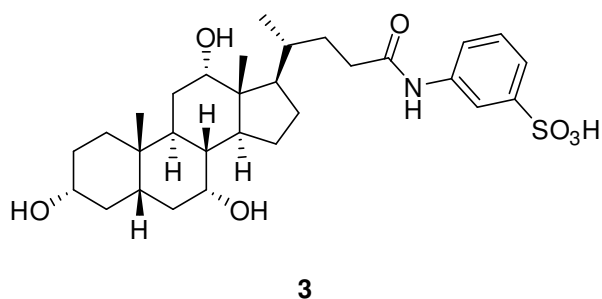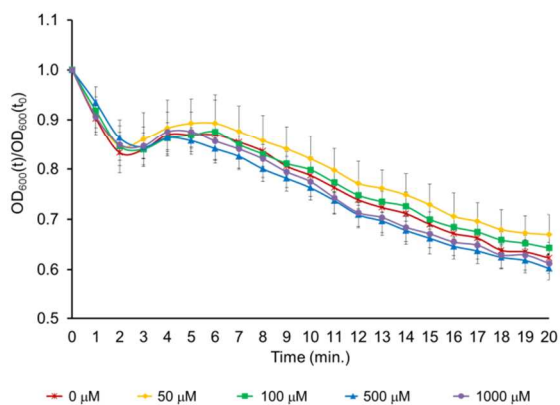

**Figure S38:** The relative OD<sub>600</sub> of spores in BHIS after 20 min. exposure to 2000 μM TCA and 0 μM, 50 μM, 100 μM, 500 μM, or 1000 μM **3**.



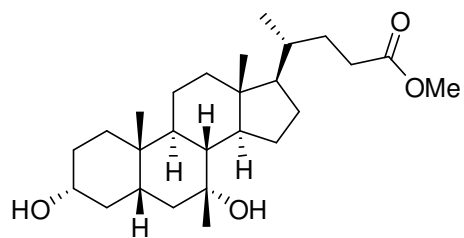

**13**

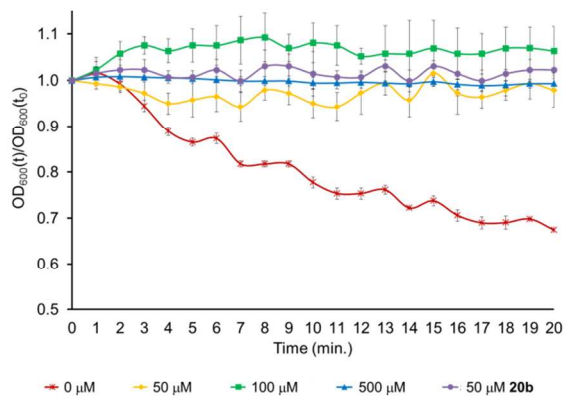

**Figure S39:** The relative OD<sub>600</sub> of spores in BHIS after 20 min. exposure to 2000 μM TCA and 0 μM **13**, 50 μM **13**, 100 μM **13**, 500 μM **13**, or 50 μM **20b**.

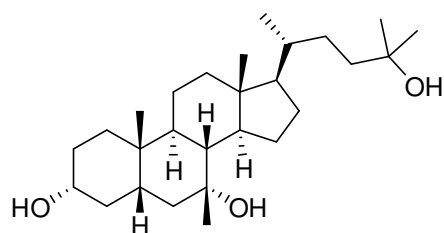

**14**

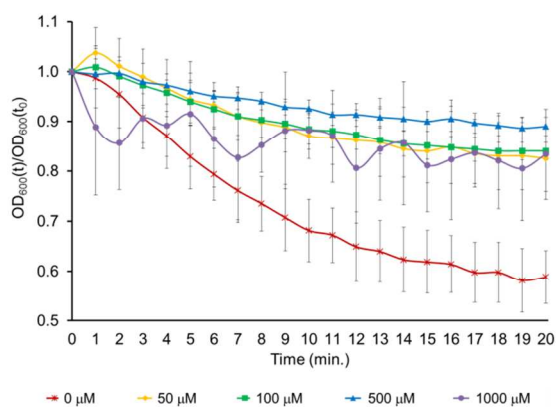

**Figure S40:** The relative OD<sub>600</sub> of spores in BHIS after 20 min. exposure to 2000 μM TCA and 0 μM, 50 μM, 100 μM, 500 μM, or 1000 μM **14**.

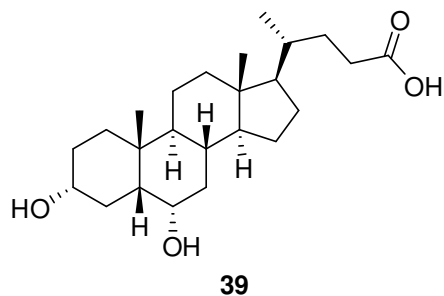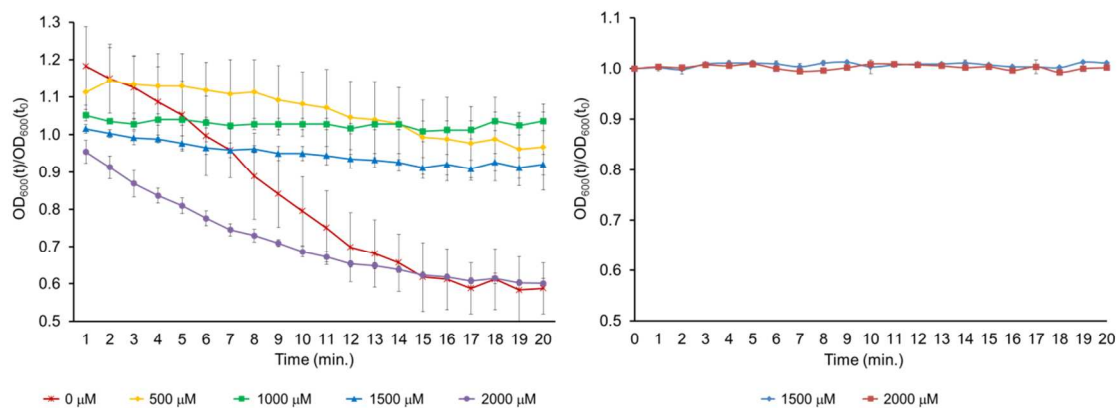

**Figure S41:** (Left): The relative OD<sub>600</sub> of spores in BHIS after 20 min. exposure to 2000 μM TCA and 0 μM, 500 μM, 1000 μM, 1500 μM, or 2000 μM **39**. (Right): The relative OD<sub>600</sub> of spores in BHIS after 20 min. exposure 1500 μM or 2000 μM **39**.

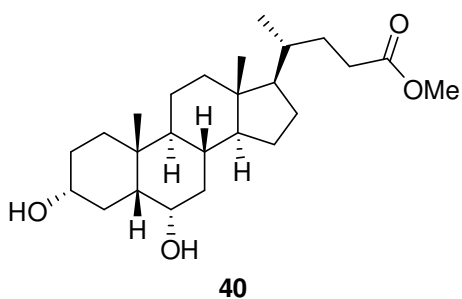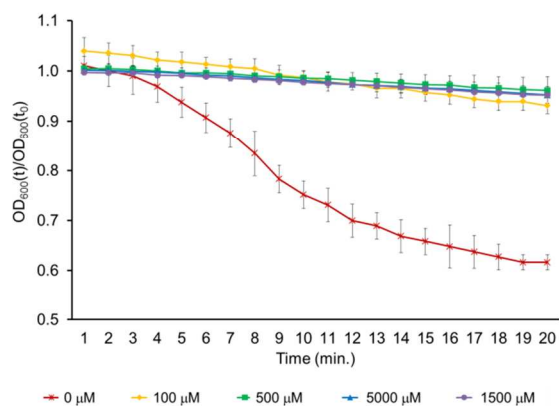

**Figure S42:** The relative OD<sub>600</sub> of spores in BHIS after 20 min. exposure to 2000 μM TCA and 0 μM, 500 μM, 1000 μM, 1500 μM, or 2000 μM **40**.

## Phase-Contrast Microscopy Assay Data for Compounds at 10 $\mu\text{M}$

Example graphs of one spore count experiment for each compound listed in Table 2. Each experiment was repeated three times.

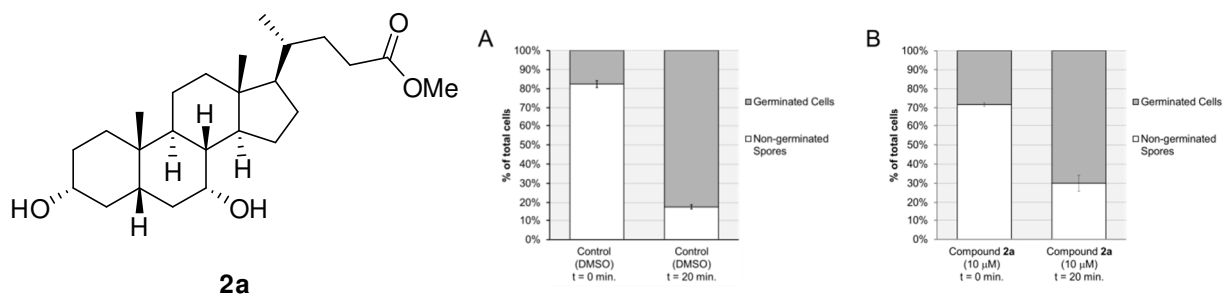

**Figure S43:** A) Under the conditions of the control experiment (BHIS, 2000  $\mu\text{M}$  TCA, and DMSO), the number of germinated spores rose from 18% to 82% over 20 min. B) The number of germinated spores rose from 28% to 70% over 20 min. in the presence of 10  $\mu\text{M}$  of **2a**.

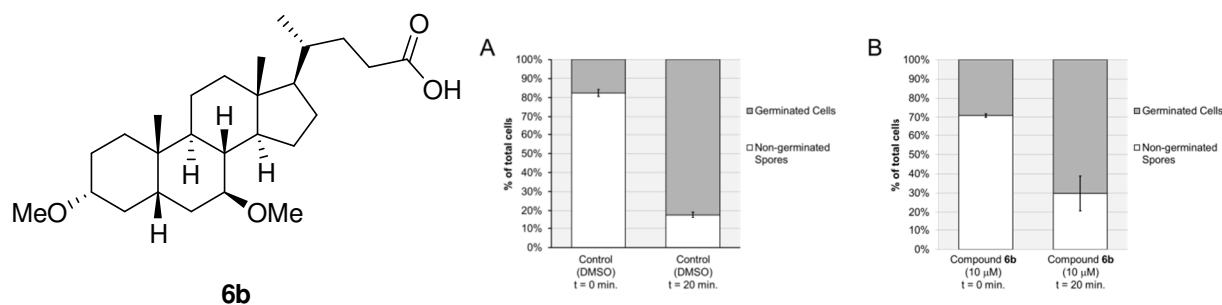

**Figure S44:** A) Under the conditions of the control experiment (BHIS, 2000  $\mu\text{M}$  TCA, and DMSO), the number of germinated spores rose from 18% to 82% over 20 min. B) The number of germinated spores rose from 29% to 70% over 20 min. in the presence of 10  $\mu\text{M}$  of **6b**.

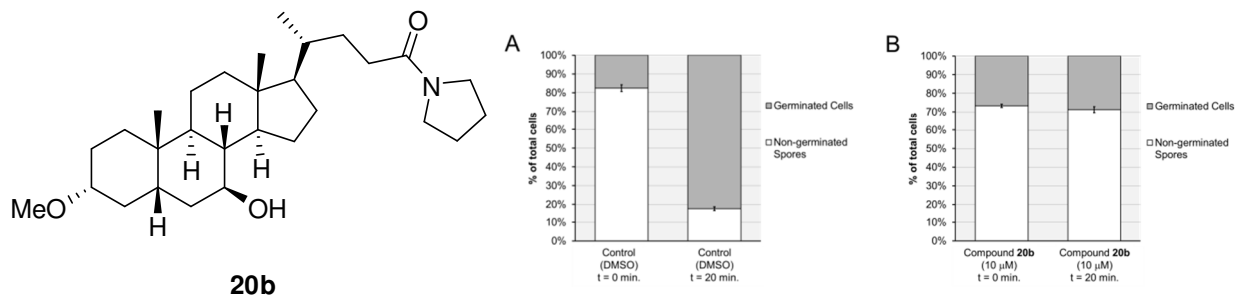

**Figure S45:** A) Under the conditions of the control experiment (BHIS, 2000 μM TCA, and DMSO), the number of germinated spores rose from 18% to 82% over 20 min. B) The number of germinated spores rose from 28% to 29% over 20 min. in the presence of 10 μM of **20b**.

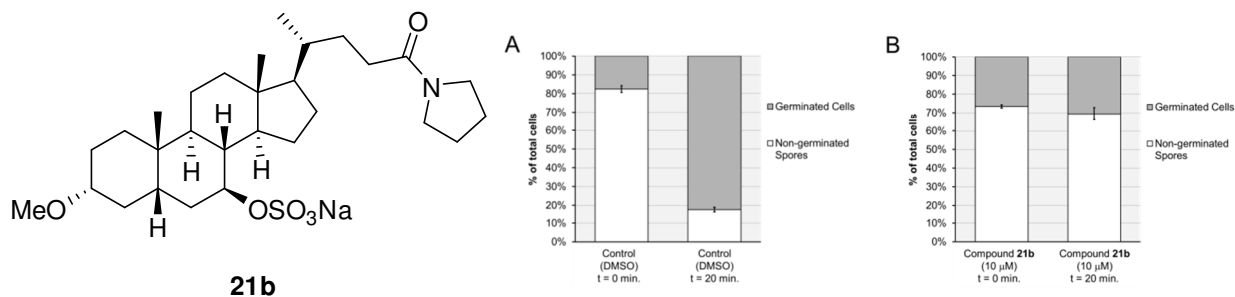

**Figure S46:** A) Under the conditions of the control experiment (BHIS, 2000 μM TCA, and DMSO), the number of germinated spores rose from 18% to 82% over 20 min. B) The number of germinated spores rose from 27% to 31% over 20 min. in the presence of 10 μM of **21b**.

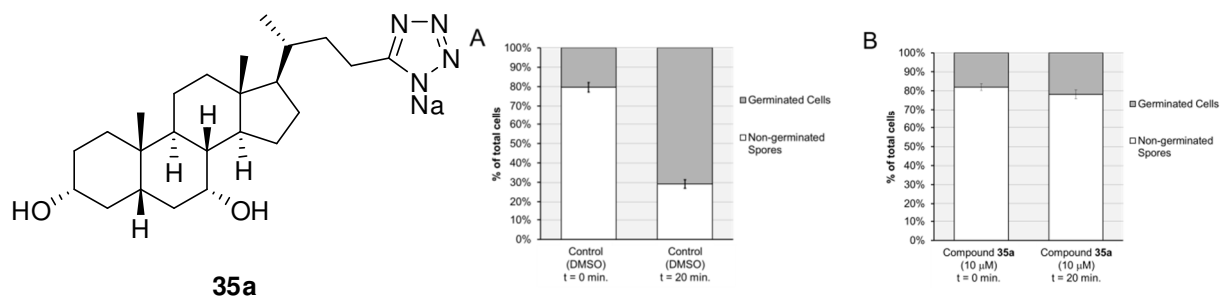

**Figure S47:** A) Under the conditions of the control experiment (BHIS, 2000  $\mu$ M TCA, and DMSO), the number of germinated spores rose from 20% to 71% over 20 min. B) The number of germinated spores rose from 18% to 22% over 20 min. in the presence of 10  $\mu$ M of **35a**.

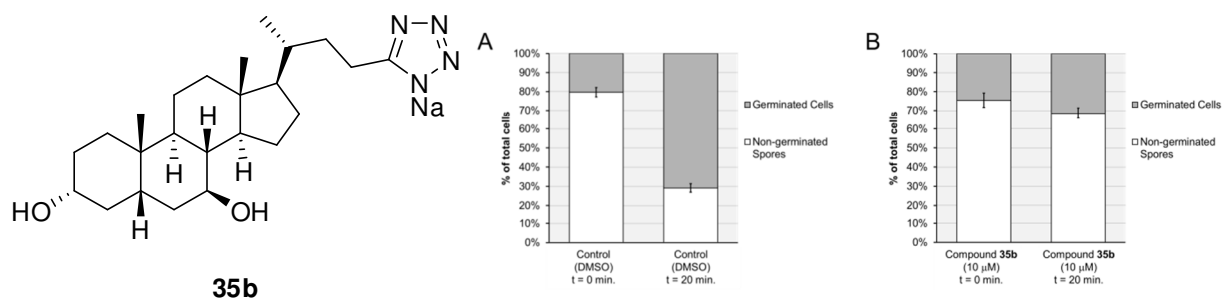

**Figure S48:** A) Under the conditions of the control experiment (BHIS, 2000  $\mu$ M TCA, and DMSO), the number of germinated spores rose from 20% to 71% over 20 min. B) The number of germinated spores rose from 25% to 32% over 20 min. in the presence of 10  $\mu$ M of **35b**.

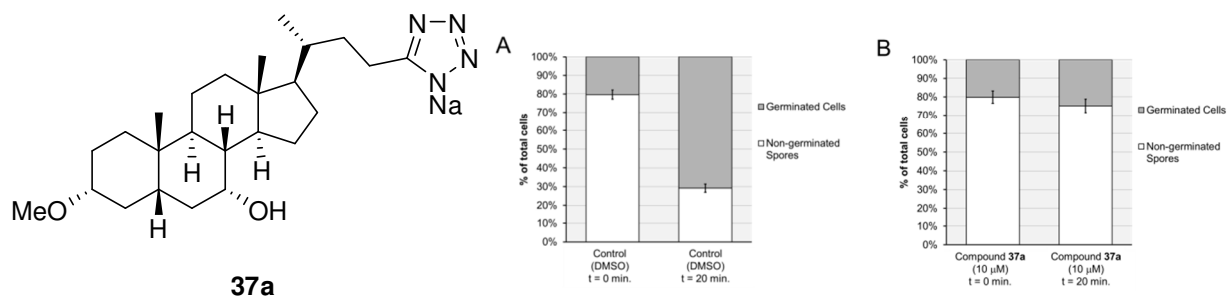

**Figure S49:** A) Under the conditions of the control experiment (BHIS, 2000  $\mu$ M TCA, and DMSO), the number of germinated spores rose from 20% to 71% over 20 min. B) The number of germinated spores rose from 20% to 25% over 20 min. in the presence of 10  $\mu$ M of **37a**.

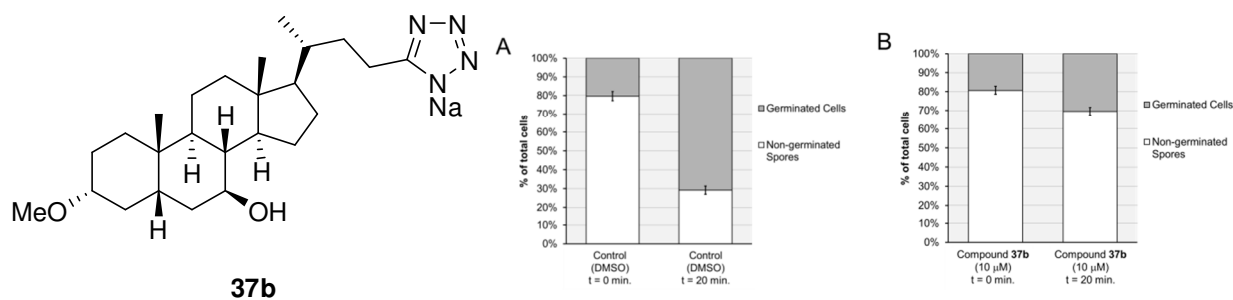

**Figure S50:** A) Under the conditions of the control experiment (BHIS, 2000  $\mu$ M TCA, and DMSO), the number of germinated spores rose from 20% to 71% over 20 min. B) The number of germinated spores rose from 19% to 30% over 20 min. in the presence of 10  $\mu$ M of **37b**.

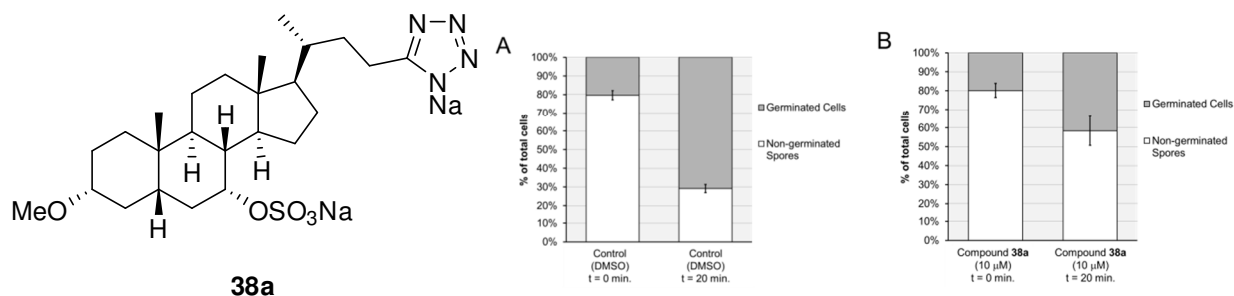

**Figure S51:** A) Under the conditions of the control experiment (BHIS, 2000  $\mu\text{M}$  TCA, and DMSO), the number of germinated spores rose from 20% to 71% over 20 min. B) The number of germinated spores rose from 20% to 42% over 20 min. in the presence of 10  $\mu\text{M}$  of **38a**.

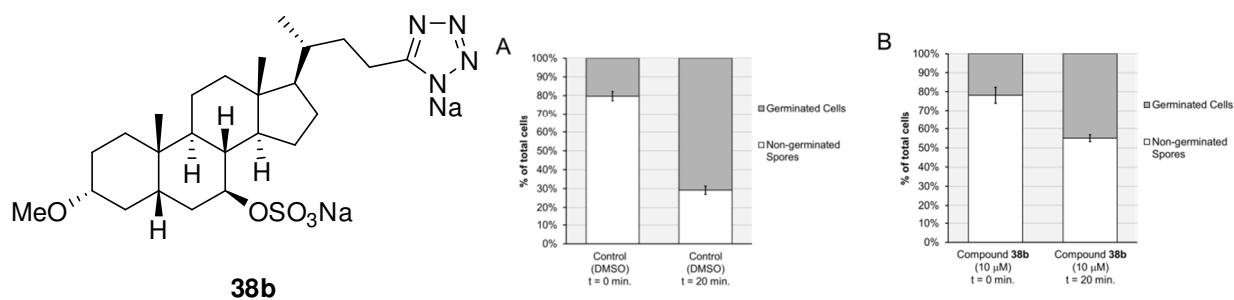

**Figure S52:** A) Under the conditions of the control experiment (BHIS, 2000  $\mu\text{M}$  TCA, and DMSO), the number of germinated spores rose from 20% to 71% over 20 min. B) The number of germinated spores rose from 22% to 45% over 20 min. in the presence of 10  $\mu\text{M}$  of **38b**.

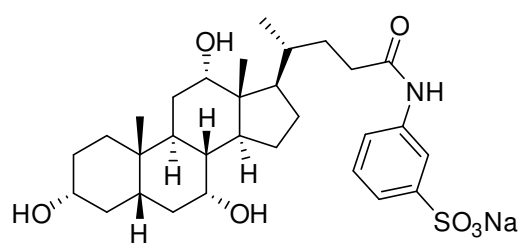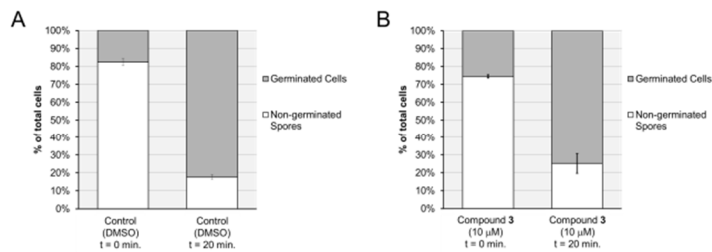

**Figure S53:** A) Under the conditions of the control experiment (BHIS, 2000  $\mu\text{M}$  TCA, and DMSO), the number of germinated spores rose from 18% to 81% over 20 min. B) The number of germinated spores rose from 25% to 74% over 20 min. in the presence of 10  $\mu\text{M}$  of **3**.

### Phase-contrast Microscopy Assay Data for Selected Compounds at 50 $\mu\text{M}$

**Table S1:** Percent germination of NAP1 spores in the presence of 2000  $\mu\text{M}$  TCA and 50  $\mu\text{M}$  bile acid analogs after 20 min.

| Number                      | R <sup>1</sup> | R <sup>2</sup> | R <sup>3</sup>                | Percent Spore Germination <sup>a</sup> |                 |                                  |
|-----------------------------|----------------|----------------|-------------------------------|----------------------------------------|-----------------|----------------------------------|
|                             |                |                |                               | t <sub>0</sub>                         | t <sub>20</sub> | Relative to control <sup>b</sup> |
| <b>20<math>\beta</math></b> |                | -OMe           | $-\beta\text{OH}$             | 16 $\pm$ 2                             | 19 $\pm$ 2      | 6 $\pm$ 2                        |
| <b>21<math>\beta</math></b> |                | -OMe           | $-\beta\text{OSO}_3\text{Na}$ | 17 $\pm$ 6                             | 16 $\pm$ 6      | -1 $\pm$ 6                       |



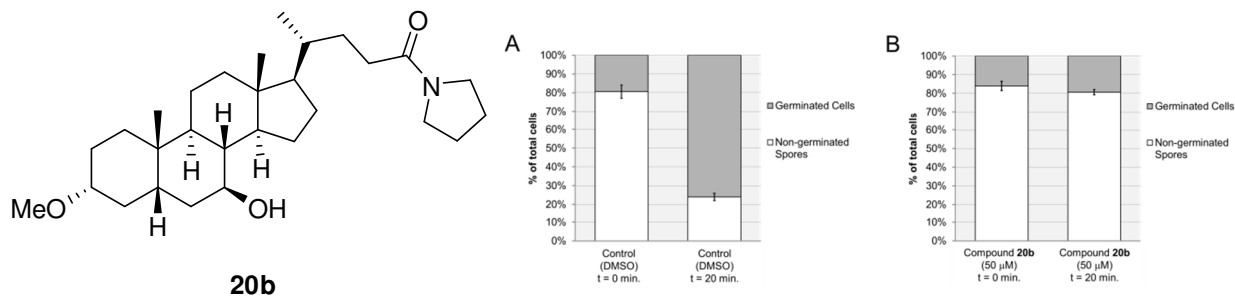

**Figure S54:** A) Under the conditions of the control experiment (BHIS, 2000 μM TCA, and DMSO), the number of germinated spores rose from 19% to 76% over 20 min. B) The number of germinated spores rose from 16% to 19% over 20 min. in the presence of 50 μM of **20b**. Data average of three runs.

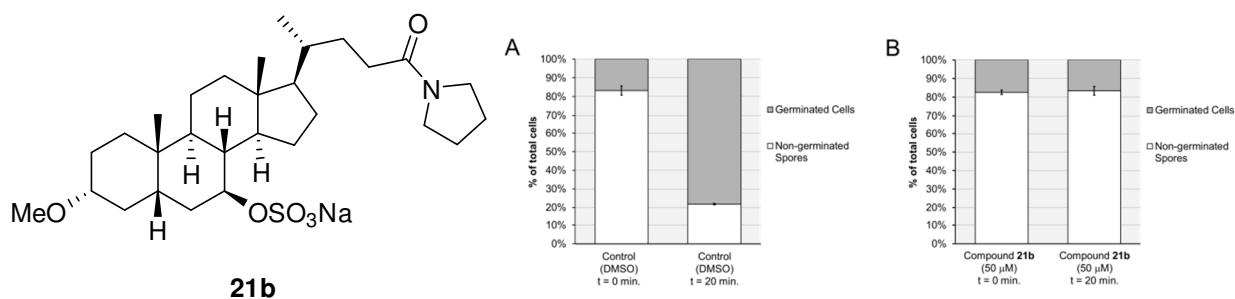

**Figure S55:** A) Under the conditions of the control experiment (BHIS, 2000 μM TCA, and DMSO), the number of germinated spores rose from 17% to 78% over 20 min. B) The number of germinated spores changed from 17% to 16% over 20 min. in the presence of 50 μM of **21b**. Data average of three runs.

# Kinetic Analysis of Spore Germination in the Presence of Selected Compounds

## Compounds

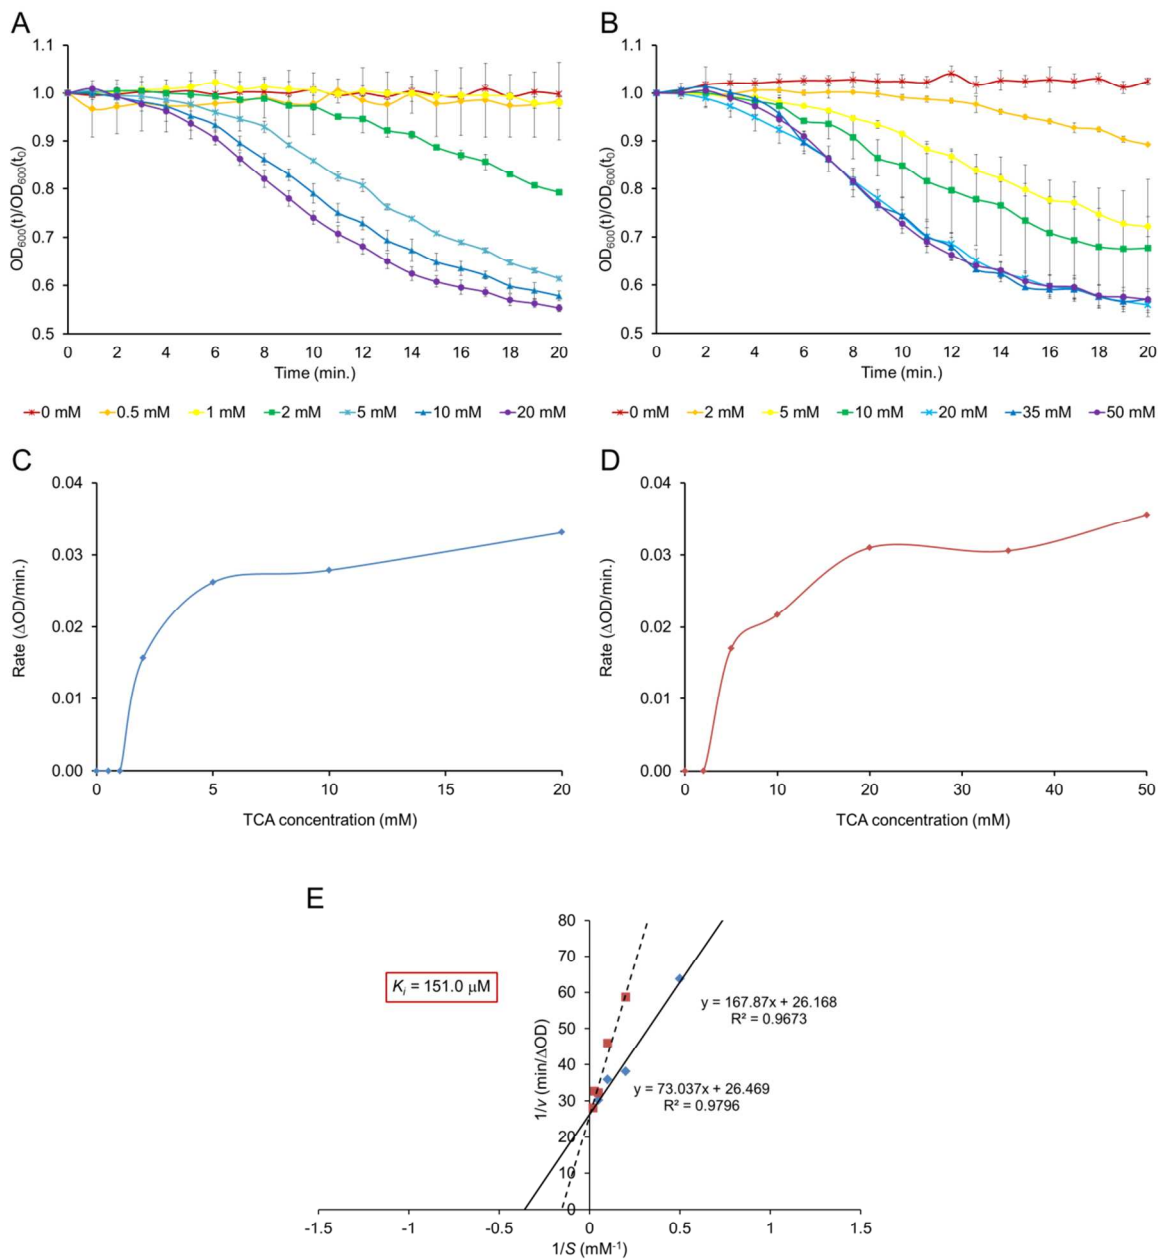

**Figure S56a:** Experiment 1. A) The relative  $OD_{600}$  of spores in BHIS after 20 min. exposure to 0 mM, 0.5 mM, 1 mM, 2 mM, 5 mM, 10 mM, or 20 mM TCA. B) The relative  $OD_{600}$  of spores in

BHIS after 20 min. exposure to 0.2 mM **2a** and 0 mM, 2 mM, 5 mM, 10 mM, 20 mM, 35 mM, 50 mM TCA. C) The linear portion of each curve in A was used to determine the maximum rate of germination for each concentration. The maximum rate of germination was plotted versus TCA concentration. D) The linear portion of each curve in B was used to determine the maximum rate of germination for each concentration. The maximum rate of germination was plotted versus TCA concentration. E) The inverse rate ( $1/v$  [min./ $\Delta OD_{600}$ ], where  $v$  = maximum rate) versus the inverse TCA concentration ( $1/S$  [mM<sup>-1</sup>], where  $S$  = inhibitor concentration) was plotted. The linear best fit line was generated and used to determine the apparent  $K_m$  for TCA and  $V_{max}$  for germination. The  $K_i$  value for **2a** was determined using the equation  $K_i = [\text{inhibitor}]/([K_m \text{ inhibitor}/K_m \text{ TCA}] - 1)$ .

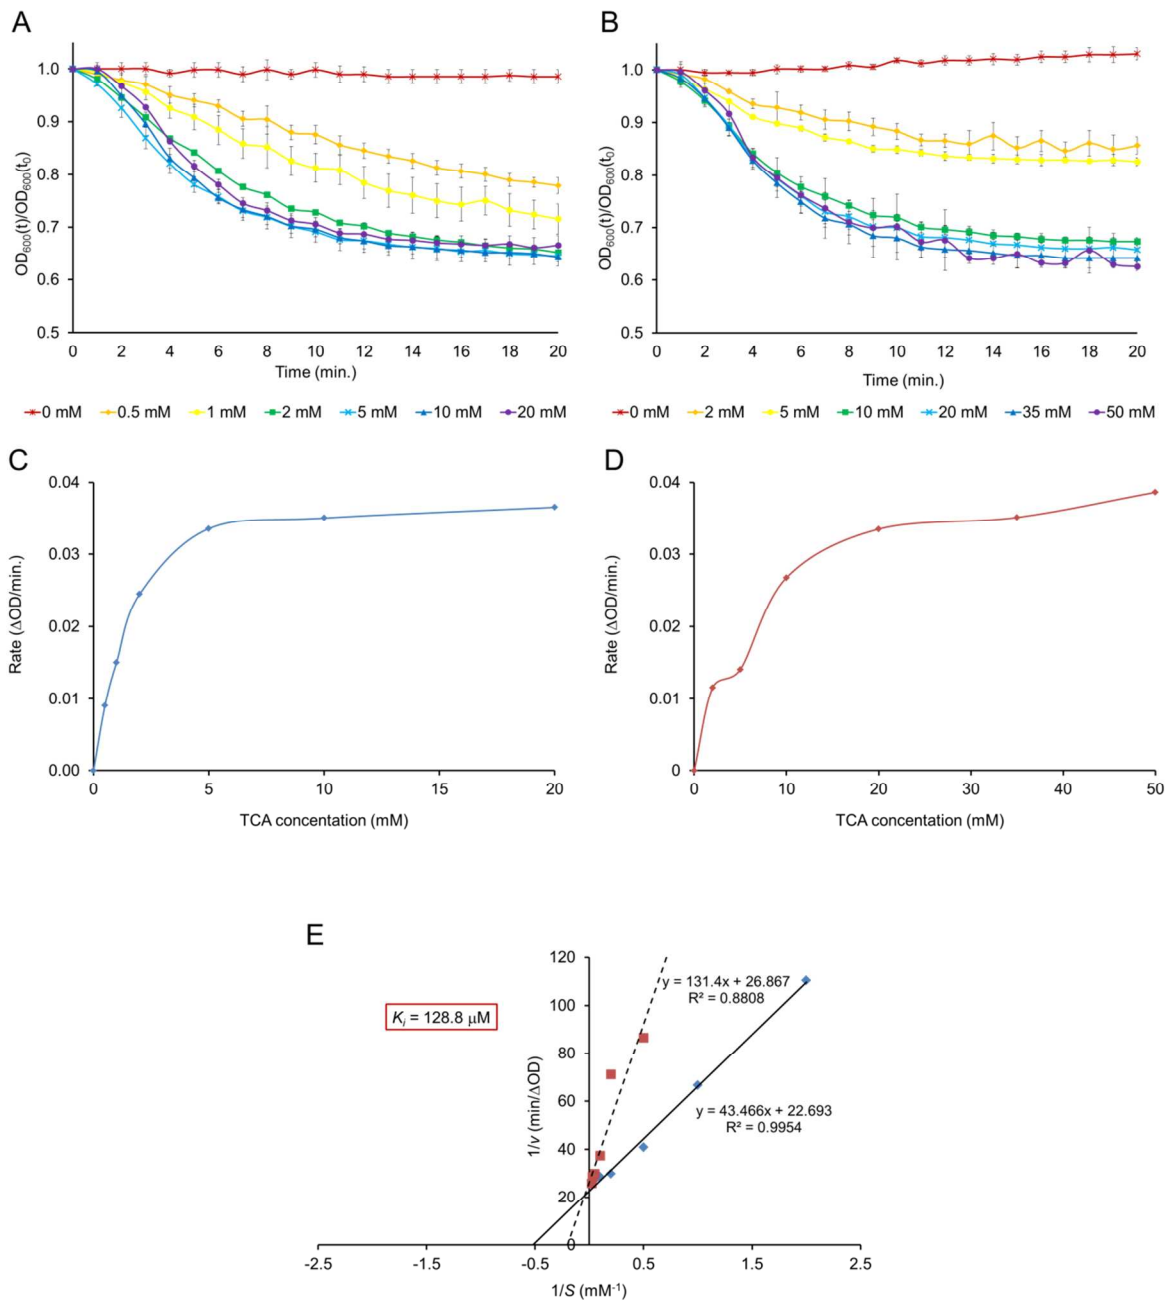

**Figure S56b:** Experiment 2.

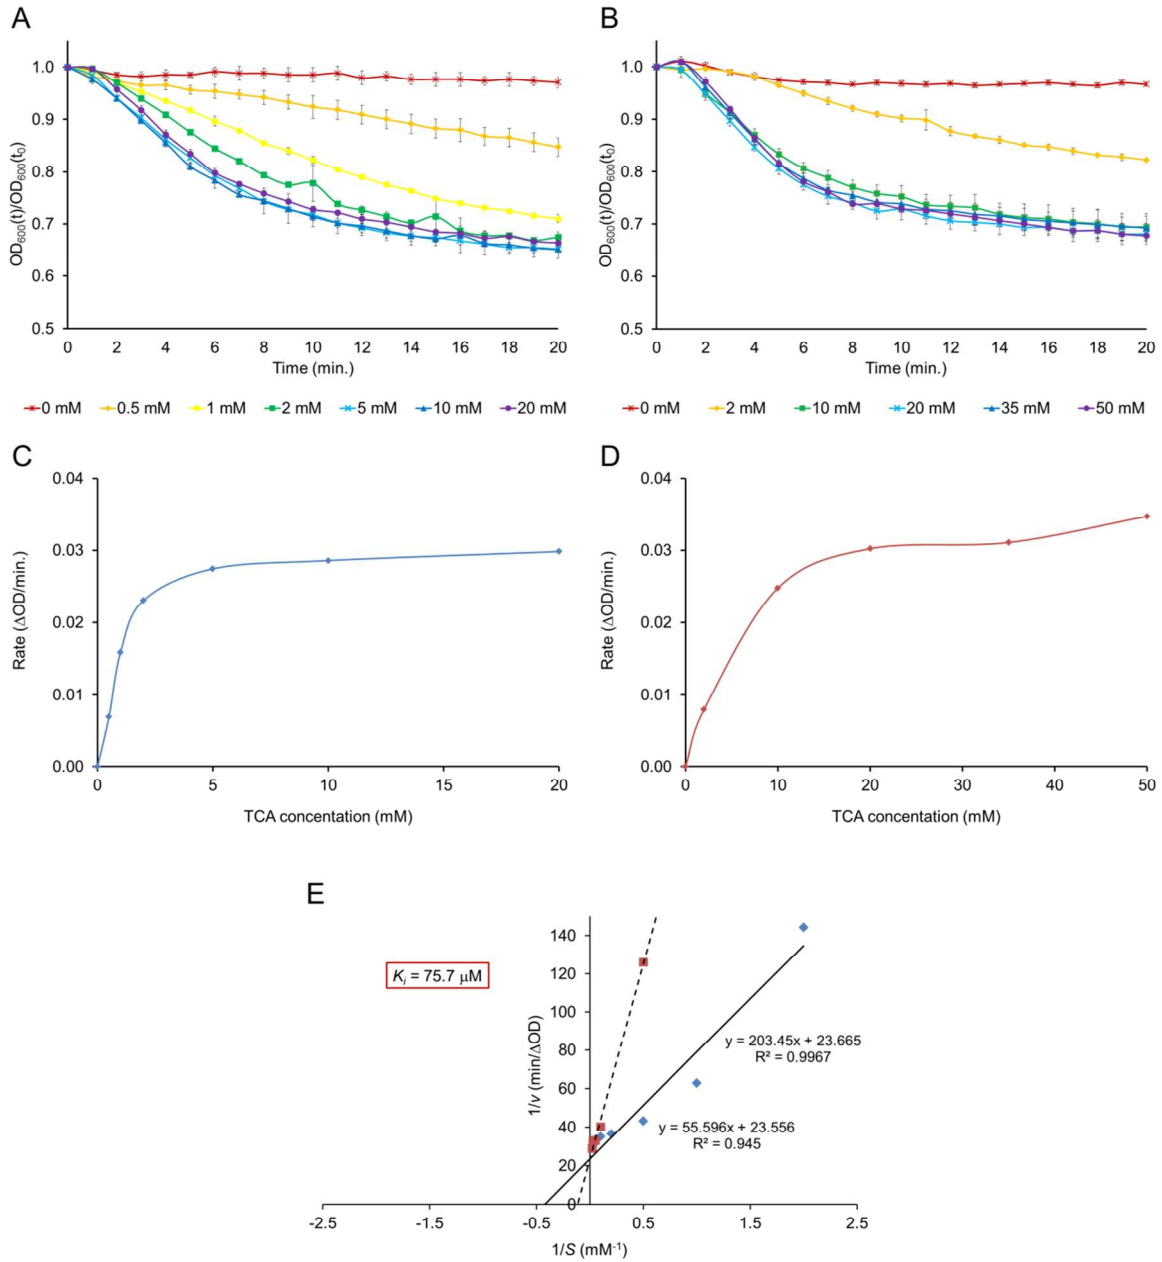

Figure S56c: Experiment 3.

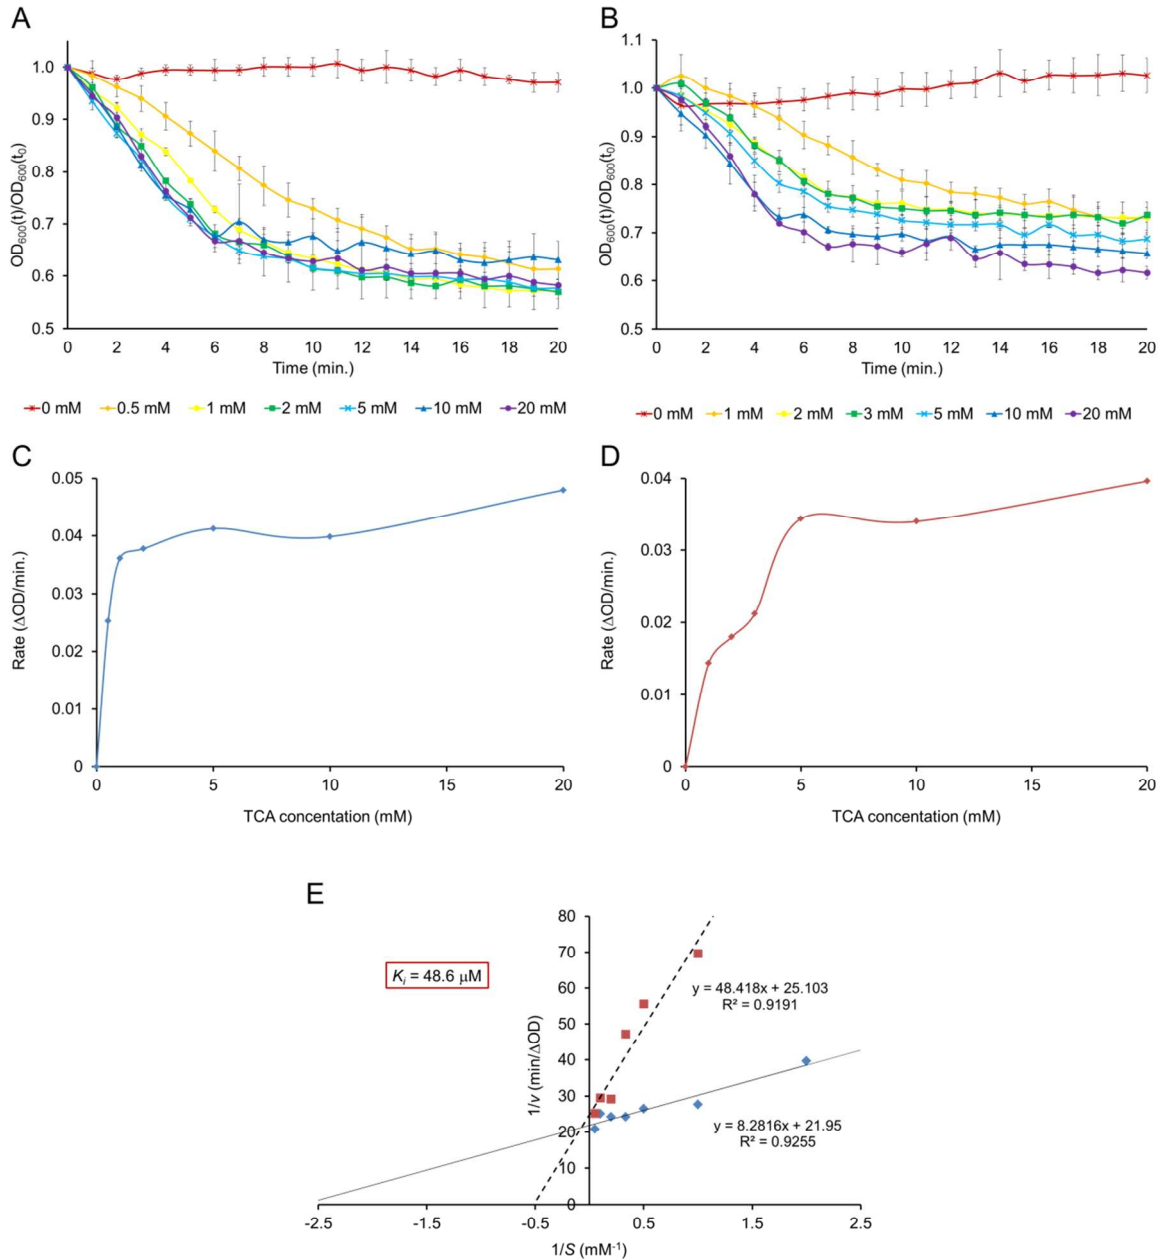

**Figure S57a:** Experiment 1. A) The relative  $OD_{600}$  of spores in BHIS after 20 min. exposure to 0 mM, 0.5 mM, 1 mM, 2 mM, 5 mM, 10 mM, or 20 mM TCA. B) The relative  $OD_{600}$  of spores in BHIS after 20 min. exposure to 0.2 mM **20b** and 0 mM, 1 mM, 2 mM, 3 mM, 5 mM, 10 mM, or 20 mM TCA. C) The linear portion of each curve in A was used to determine the maximum rate of germination for each concentration. The maximum rate of germination was plotted versus

TCA concentration. D) The linear portion of each curve in B was used to determine the maximum rate of germination for each concentration. The maximum rate of germination was plotted versus TCA concentration. E) The inverse rate ( $1/v$  [min./ $\Delta OD_{600}$ ], where  $v$  = maximum rate) versus the inverse TCA concentration ( $1/S$  [mM<sup>-1</sup>], where  $S$  = inhibitor concentration) was plotted. The linear best fit line was generated and used to determine the apparent  $K_m$  for TCA and  $V_{max}$  for germination. The  $K_i$  value for **20b** was determined using the equation  $K_i = [\text{inhibitor}]/([K_m \text{ inhibitor}/K_m \text{ TCA}] - 1)$ .

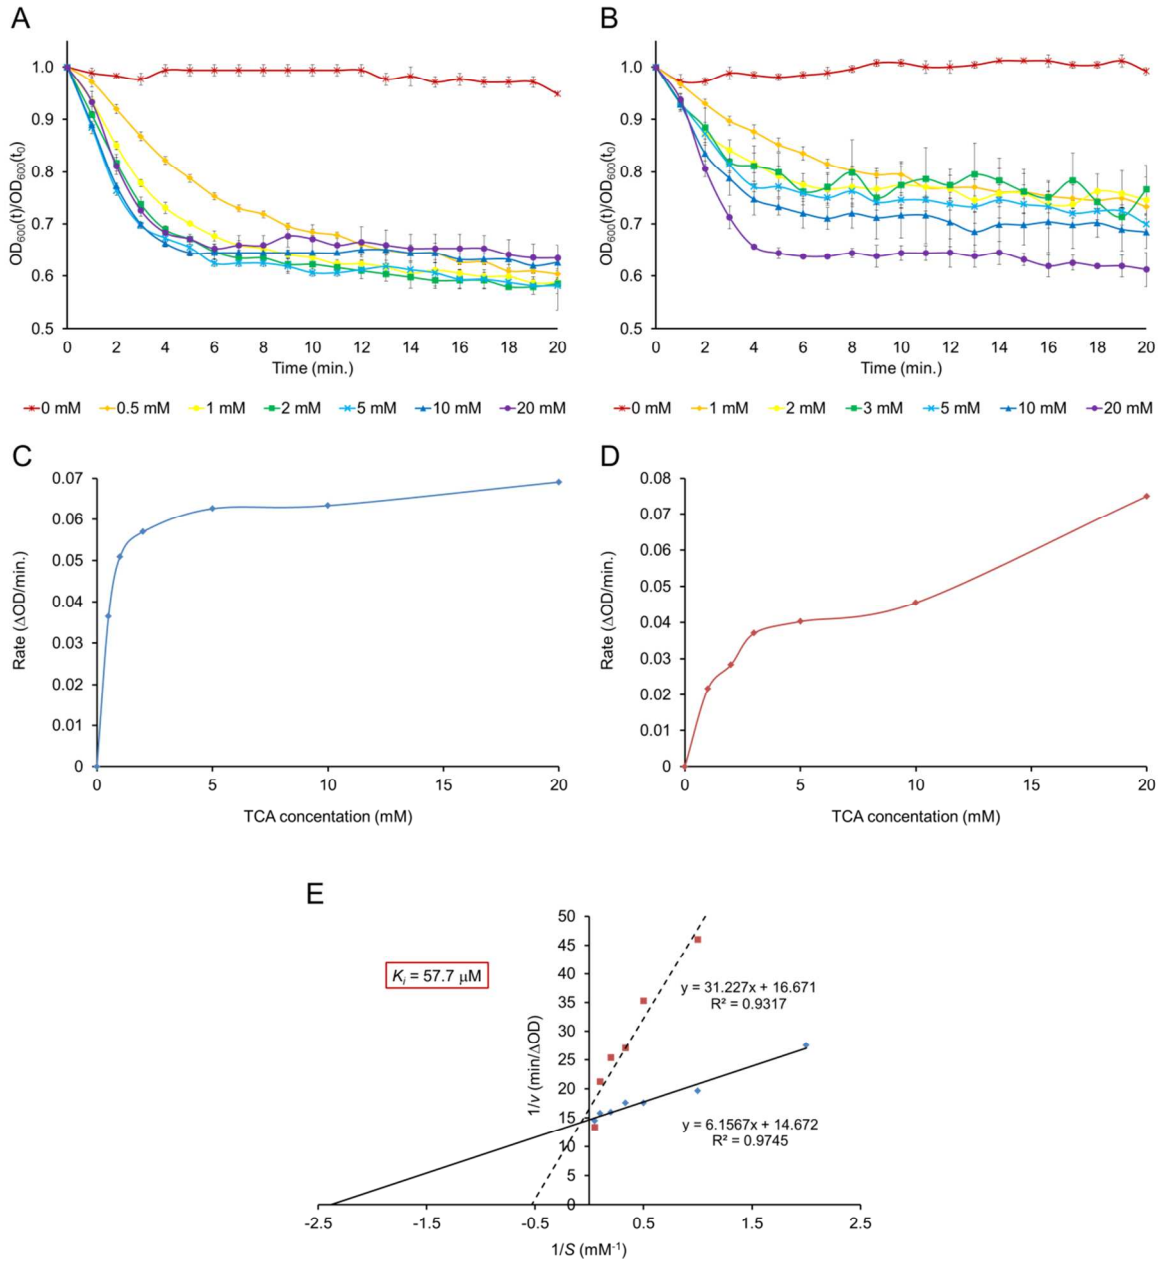

**Figure S57b:** Experiment 2.



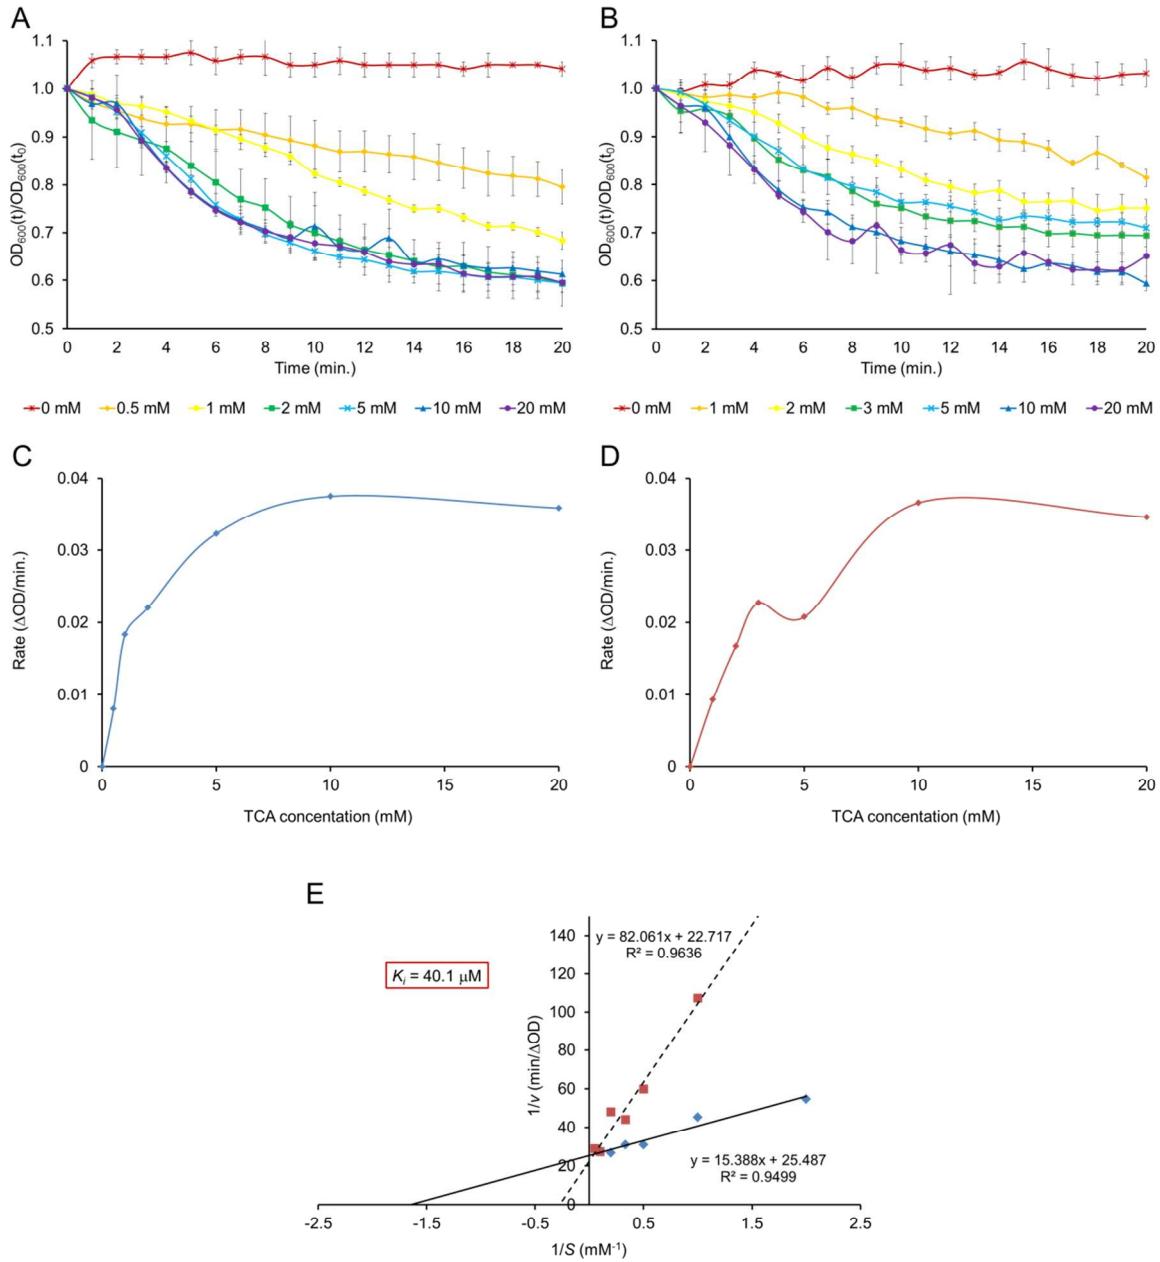

Figure S57c: Experiment 3.

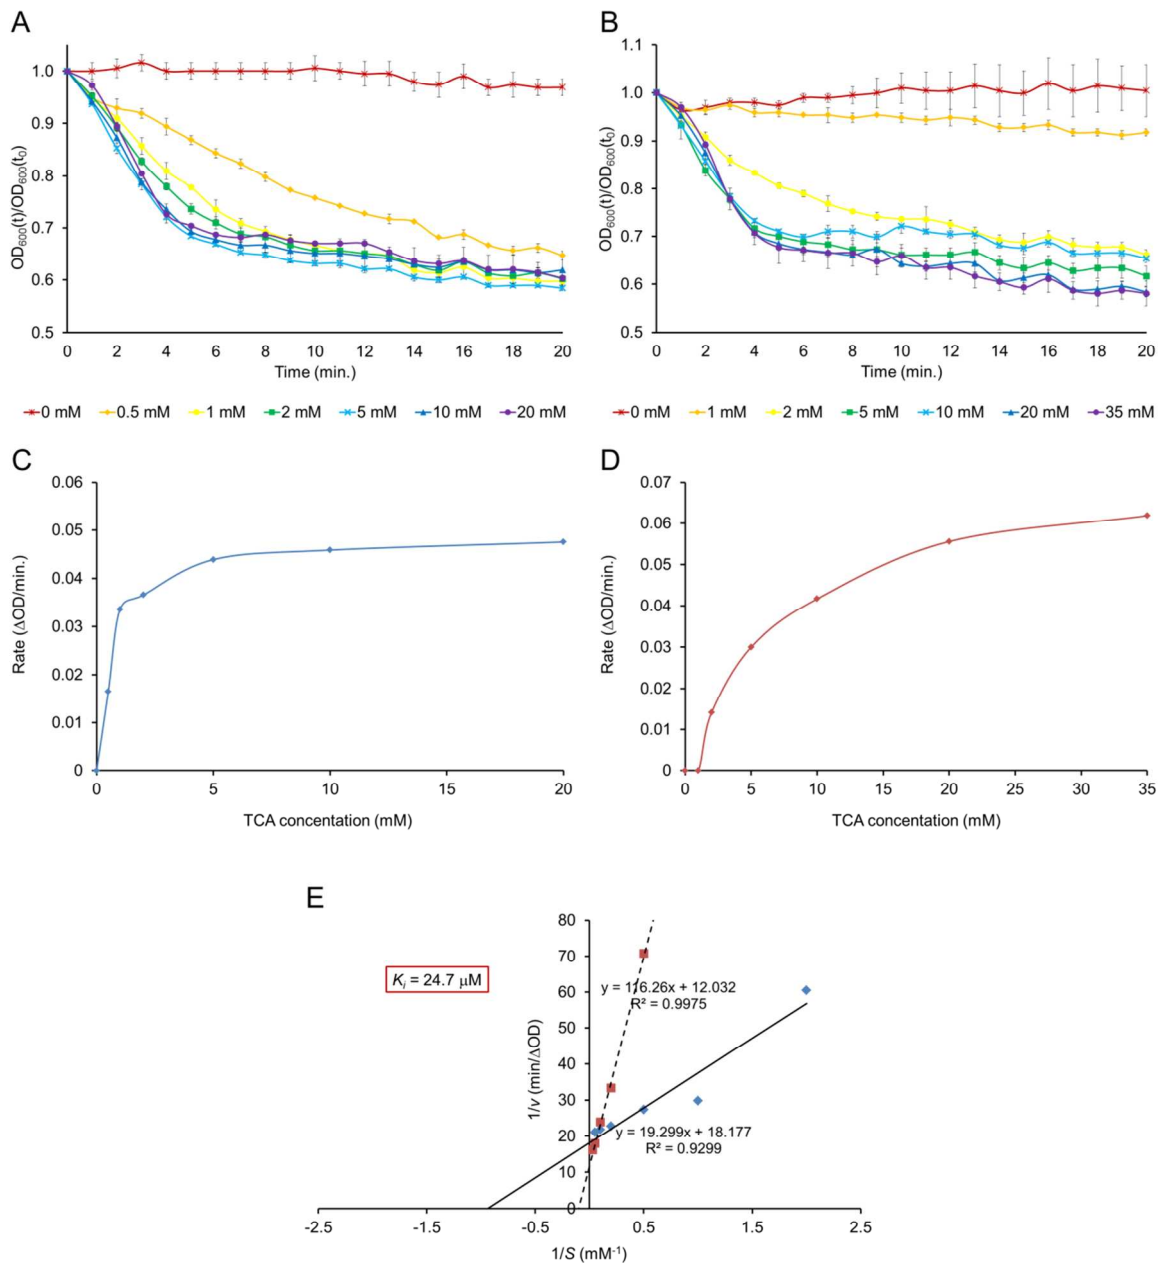

**Figure S58a:** Experiment 1. A) The relative  $OD_{600}$  of spores in BHIS after 20 min. exposure to 0 mM, 1 mM, 2 mM, 5 mM, 10 mM, or 20 mM TCA. B) The relative  $OD_{600}$  of spores in BHIS after 20 min. exposure to 0.2 mM **21b** and 0 mM, 1 mM, 2 mM, 5 mM, 10 mM, 20 mM, or 35 mM TCA. C) The linear portion of each curve in A was used to determine the maximum rate of germination for each concentration. The maximum rate of germination was plotted versus TCA

concentration. D) The linear portion of each curve in B was used to determine the maximum rate of germination for each concentration. The maximum rate of germination was plotted versus TCA concentration. E) The inverse rate ( $1/v$  [min./ $\Delta OD_{600}$ ], where  $v$  = maximum rate) versus the inverse TCA concentration ( $1/S$  [ $mM^{-1}$ ], where  $S$  = inhibitor concentration) was plotted. The linear best fit line was generated and used to determine the apparent  $K_m$  for TCA and  $V_{max}$  for germination. The  $K_i$  value for **21b** was determined using the equation  $K_i = [\text{inhibitor}] / ([K_m \text{ TCA}] - 1)$ .

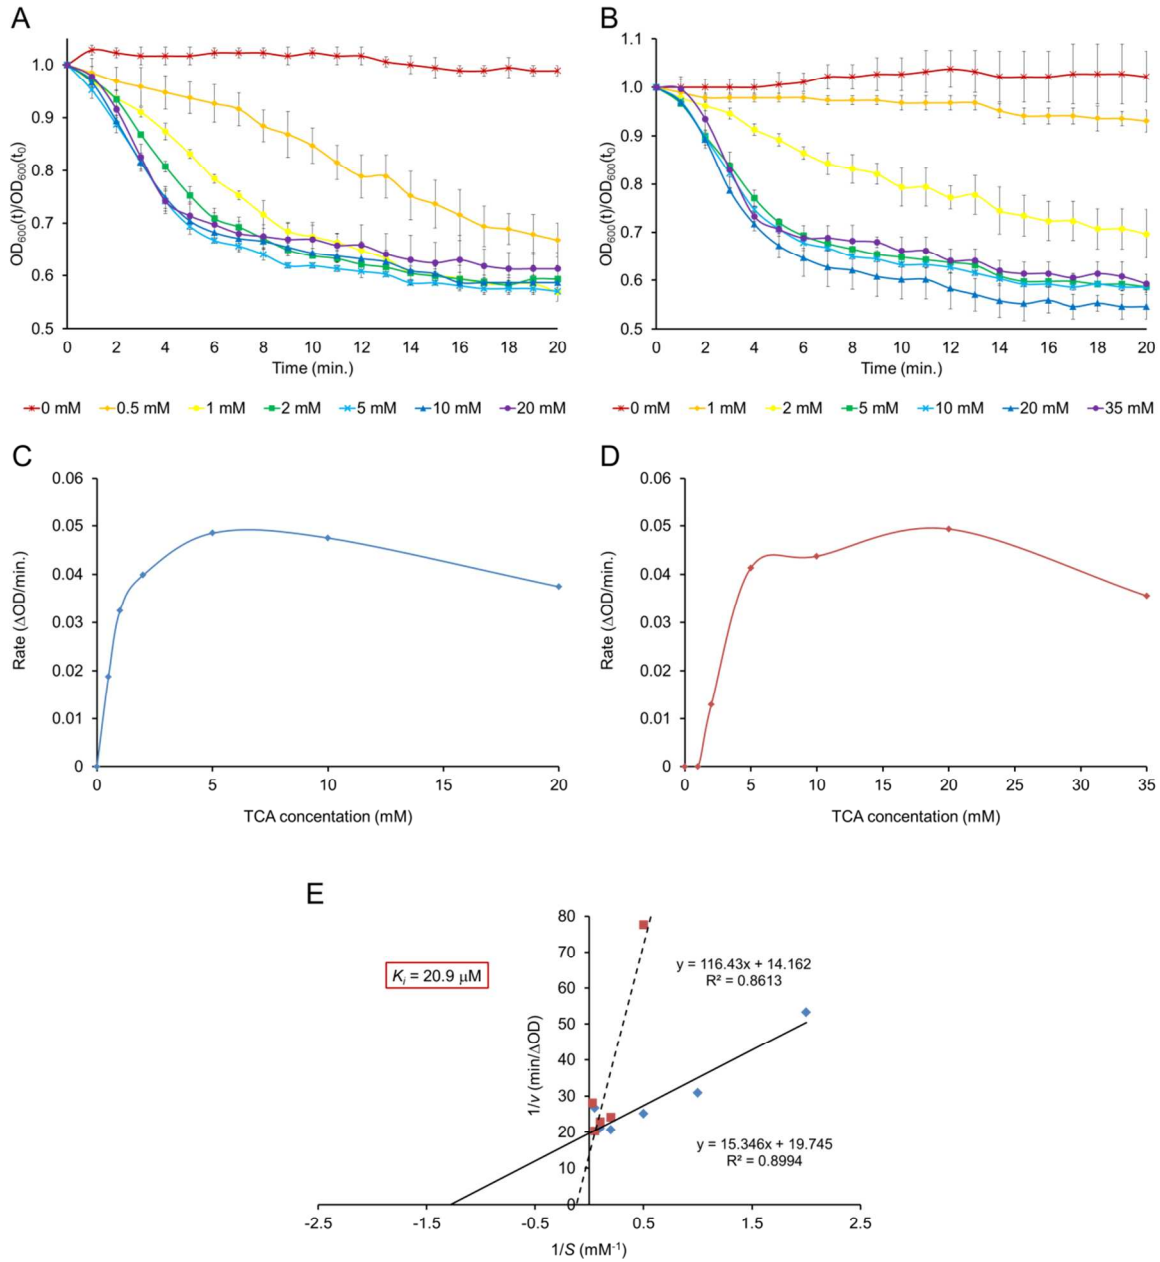

**Figure S58b:** Experiment 2.

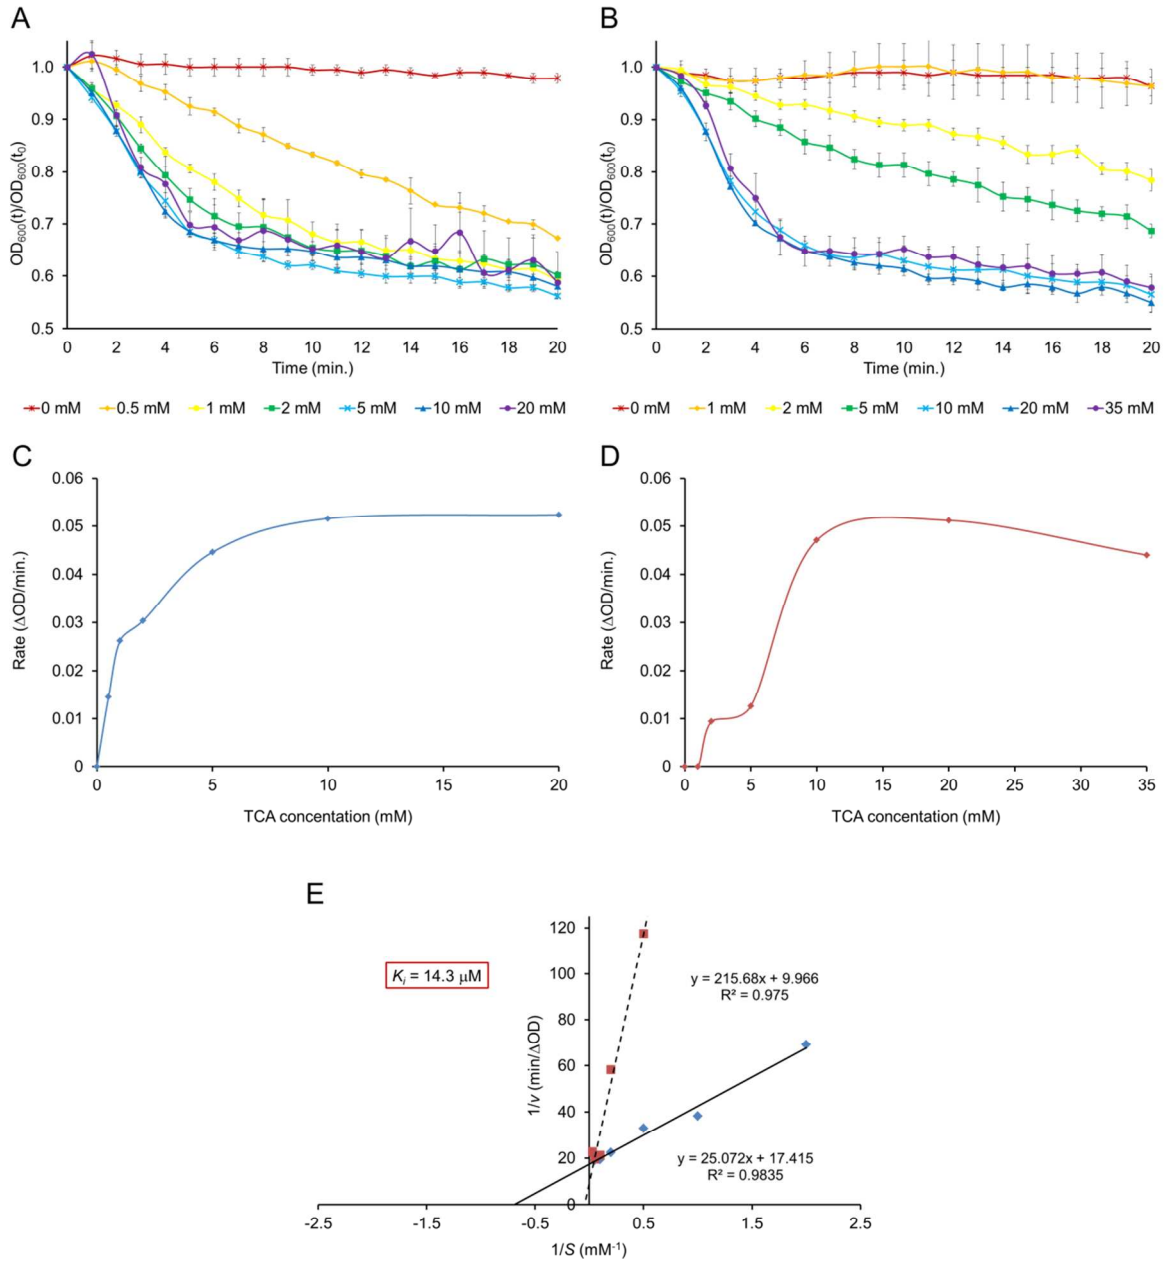

Figure S58c: Experiment 3.

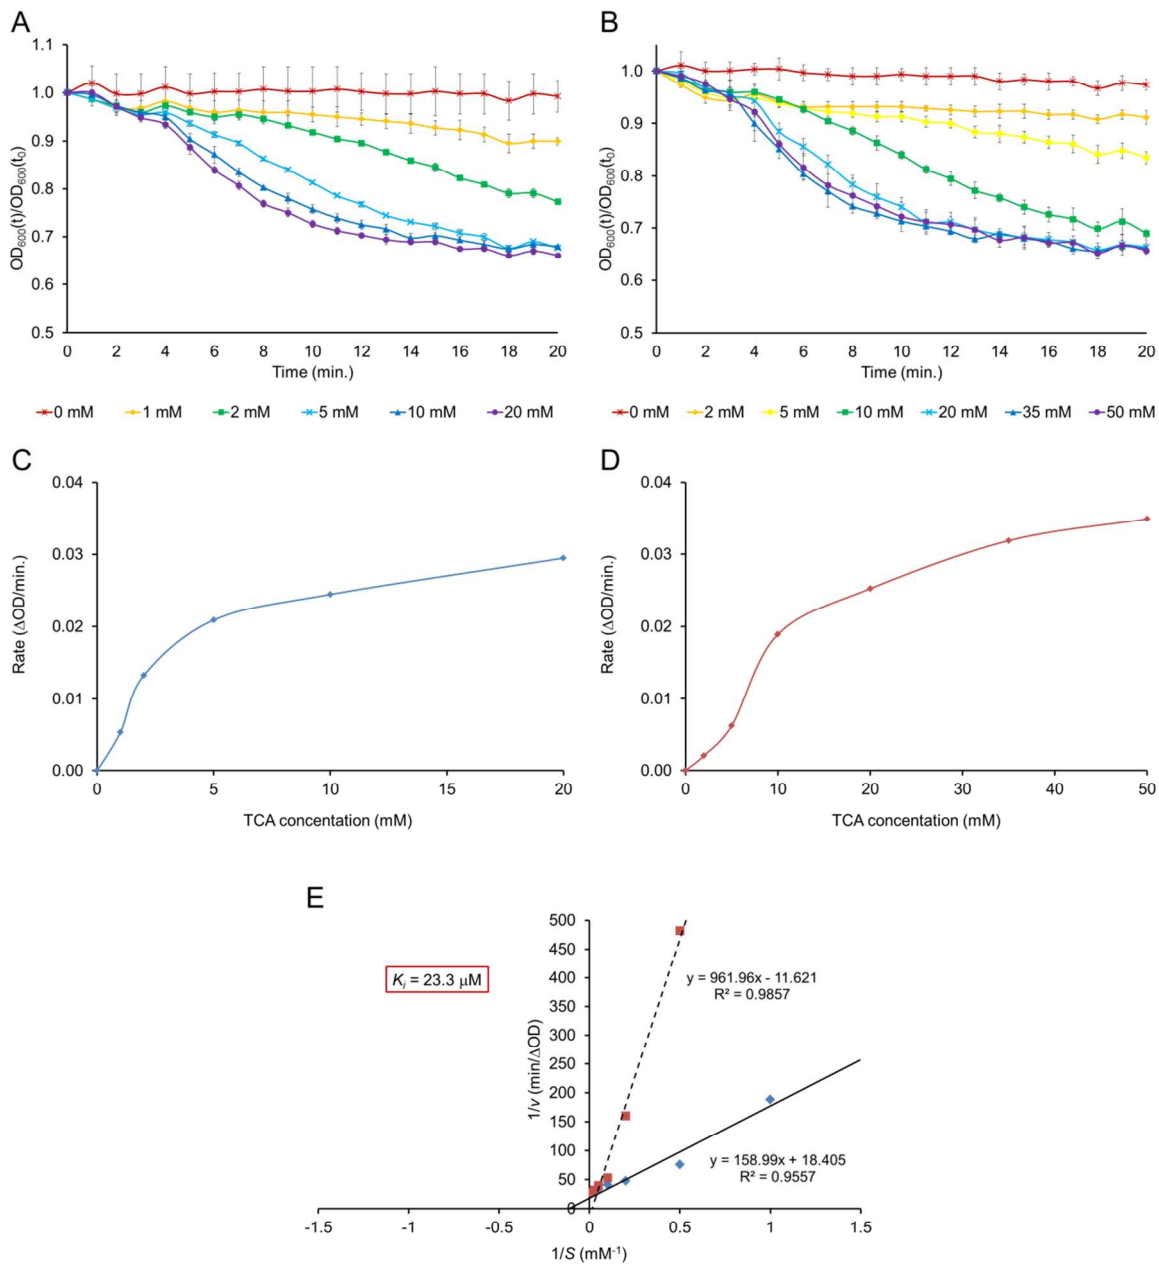

**Figure S59a:** Experiment 1. A) The relative  $OD_{600}$  of spores in BHIS after 20 min. exposure to 0 mM, 1 mM, 2 mM, 5 mM, 10 mM, or 20 mM TCA. B) The relative  $OD_{600}$  of spores in BHIS after 20 min. exposure to 0.2 mM **37a** and 0 mM, 2 mM, 5 mM, 10 mM, 20 mM, 35 mM, or 50 mM TCA. C) The linear portion of each curve in A was used to determine the maximum rate of germination for each concentration. The maximum rate of germination was plotted versus TCA

concentration. D) The linear portion of each curve in B was used to determine the maximum rate of germination for each concentration. The maximum rate of germination was plotted versus TCA concentration. E) The inverse rate ( $1/v$  [min./ $\Delta OD_{600}$ ], where  $v$  = maximum rate) versus the inverse TCA concentration ( $1/S$  [ $mM^{-1}$ ], where  $S$  = inhibitor concentration) was plotted. The linear best fit line was generated and used to determine the apparent  $K_m$  for TCA and  $V_{max}$  for germination. The  $K_i$  value for **37a** was determined using the equation  $K_i = [inhibitor]/([K_m$   
*inhibitor*/ $K_m$  TCA] - 1).

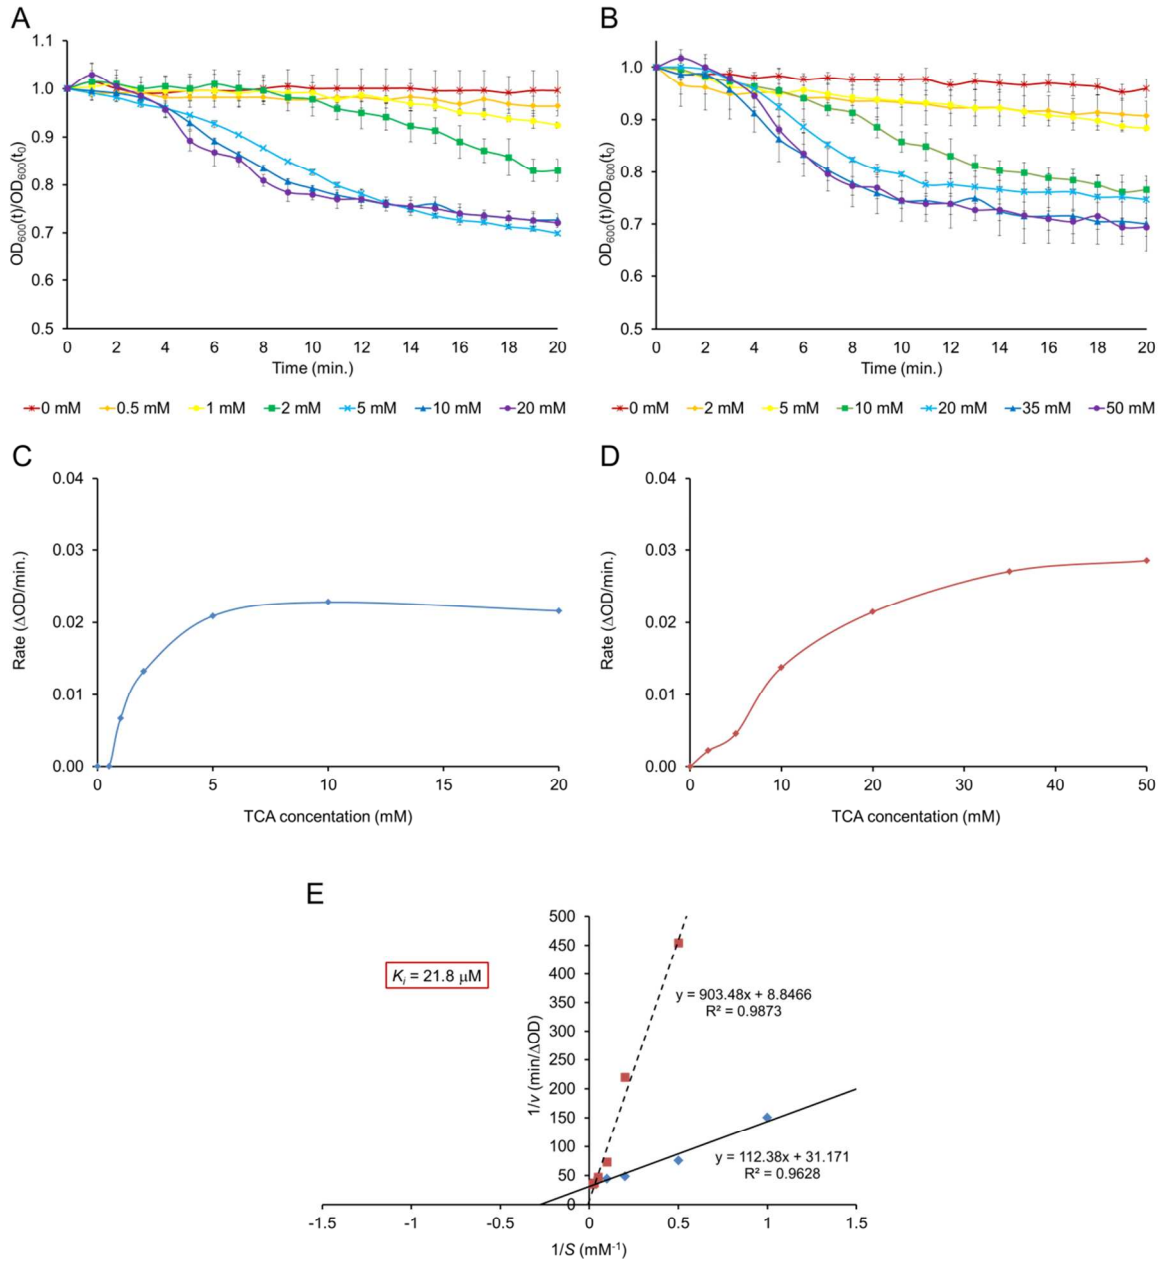

**Figure S59b:** Experiment 2.



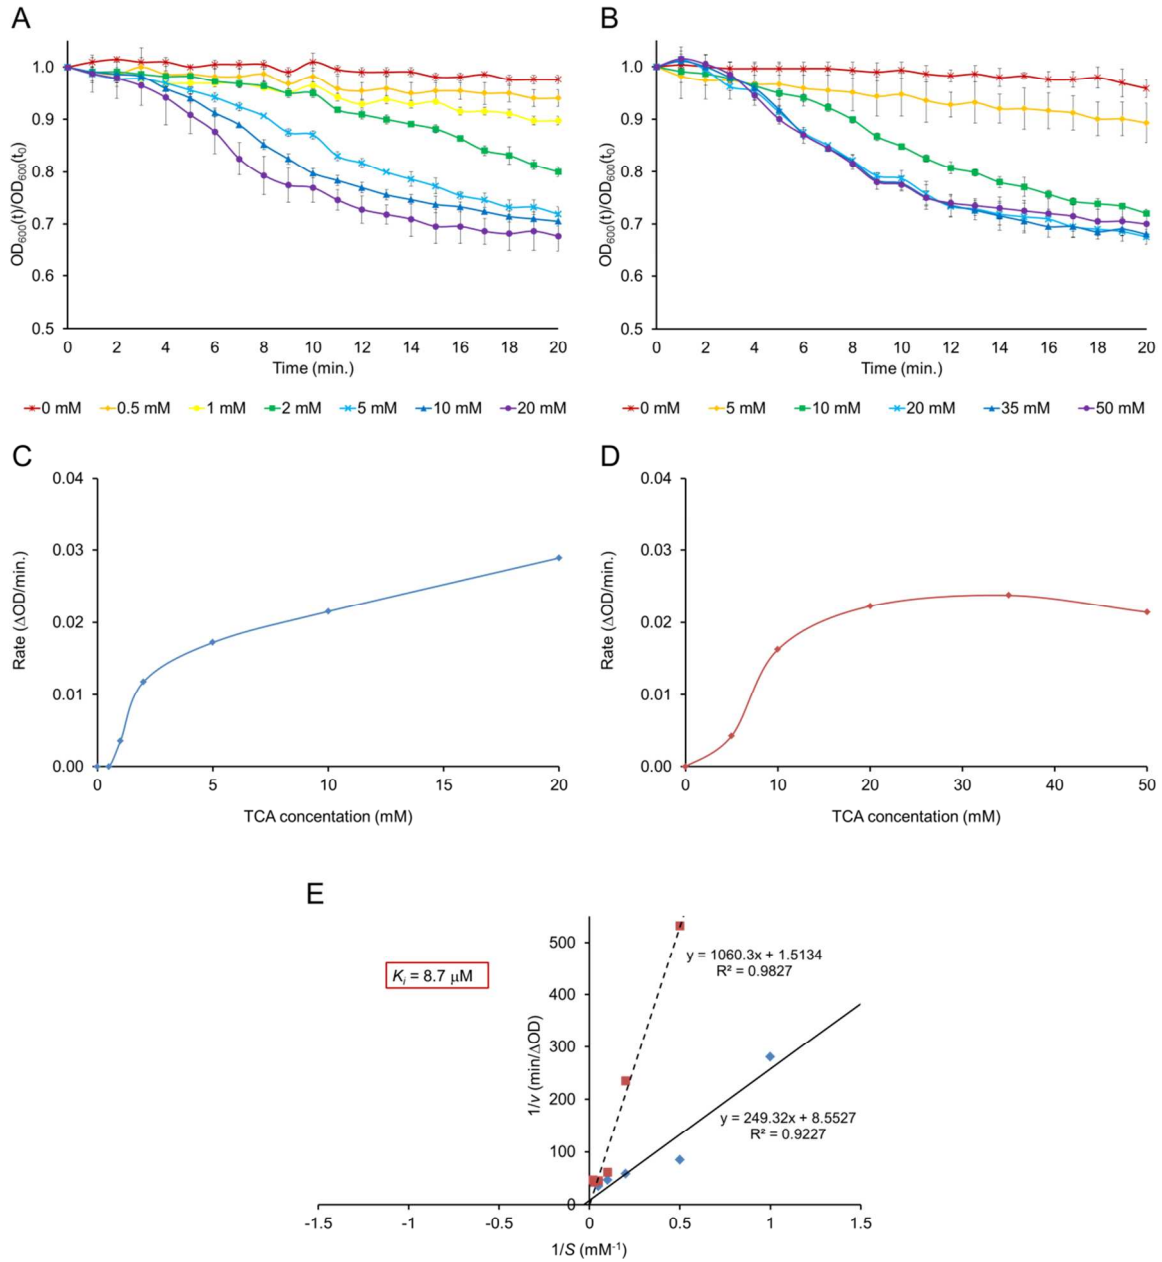

Figure S59c: Experiment 3.

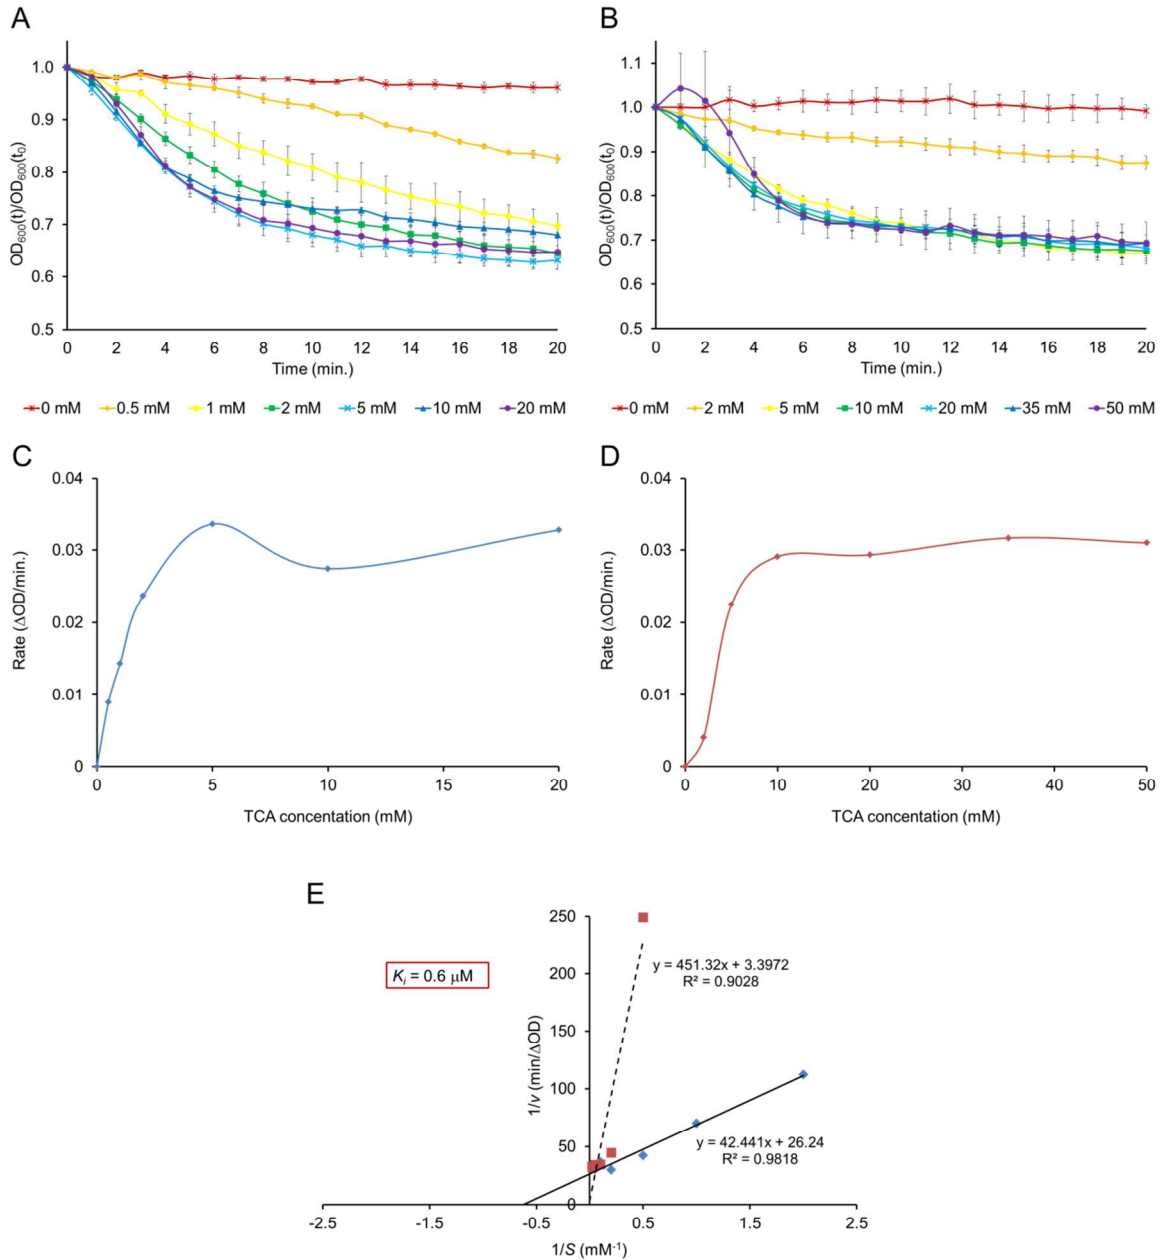

**Figure S60a:** Experiment 1. A) The relative  $OD_{600}$  of spores in BHIS after 20 min. exposure to 0 mM, 1 mM, 2 mM, 5 mM, 10 mM, or 20 mM TCA. B) The relative  $OD_{600}$  of spores in BHIS after 20 min. exposure to 0.05 mM **38b** and 0 mM, 2 mM, 5 mM, 10 mM, 20 mM, 35 mM, or 50 mM TCA. C) The linear portion of each curve in A was used to determine the maximum rate of germination for each concentration. The maximum rate of germination was plotted versus TCA

concentration. D) The linear portion of each curve in B was used to determine the maximum rate of germination for each concentration. The maximum rate of germination was plotted versus TCA concentration. E) The inverse rate ( $1/v$  [min./ $\Delta OD_{600}$ ], where  $v$  = maximum rate) versus the inverse TCA concentration ( $1/S$  [ $mM^{-1}$ ], where  $S$  = inhibitor concentration) was plotted. The linear best fit line was generated and used to determine the apparent  $K_m$  for TCA and  $V_{max}$  for germination. The  $K_i$  value for **38b** was determined using the equation  $K_i = [\text{inhibitor}] / ([K_m \text{ TCA}] - 1)$ .

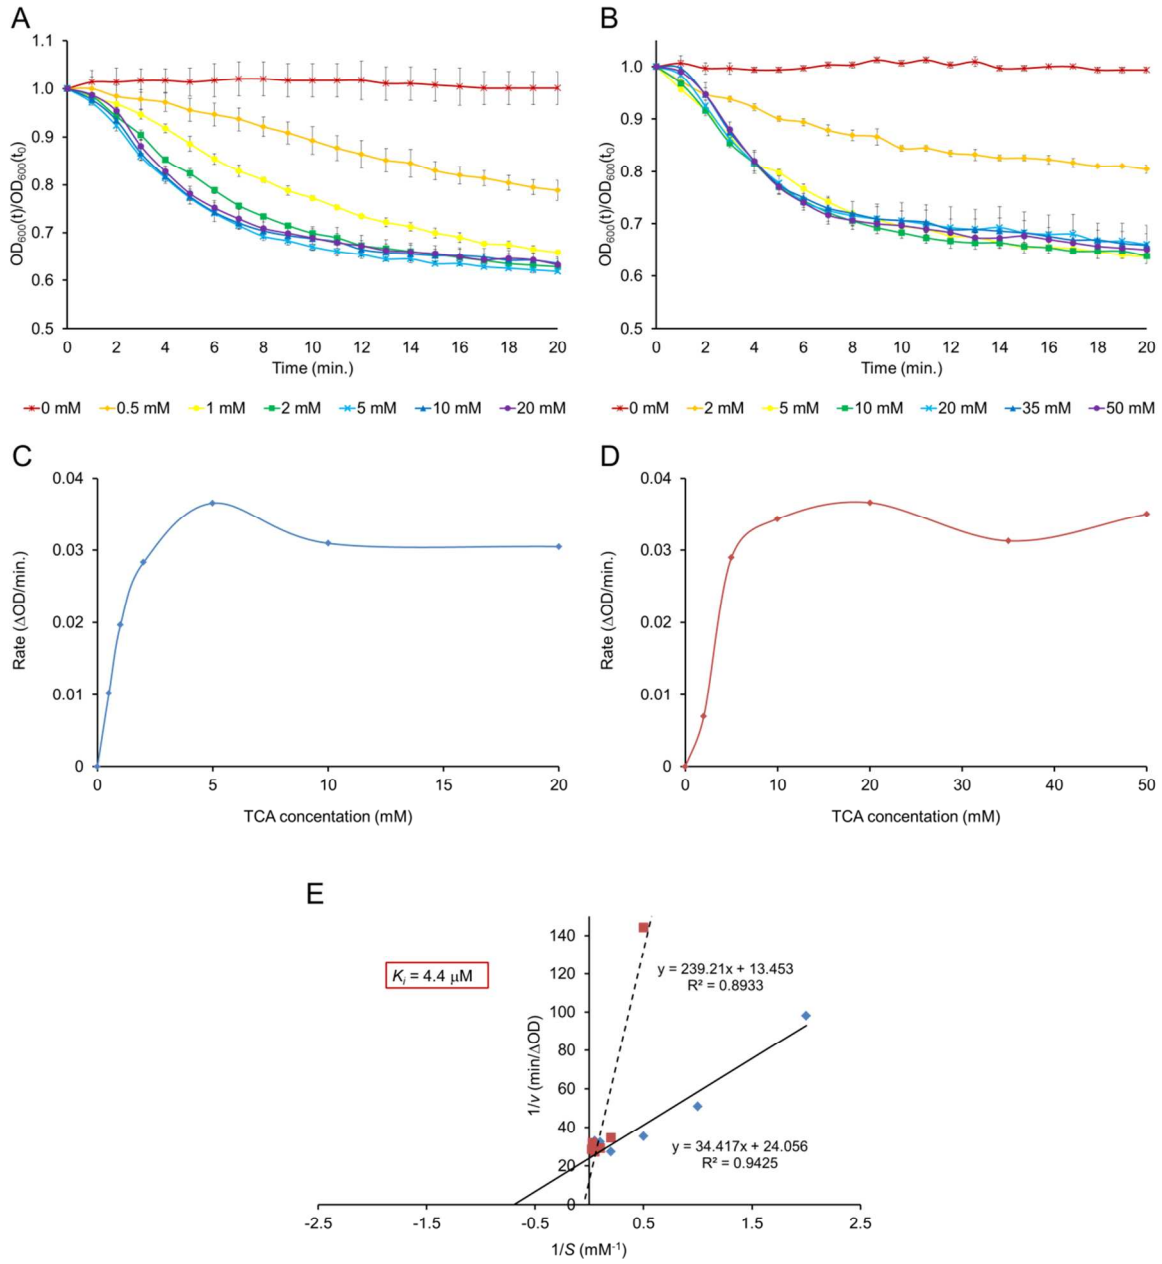

**Figure S60b:** Experiment 2.

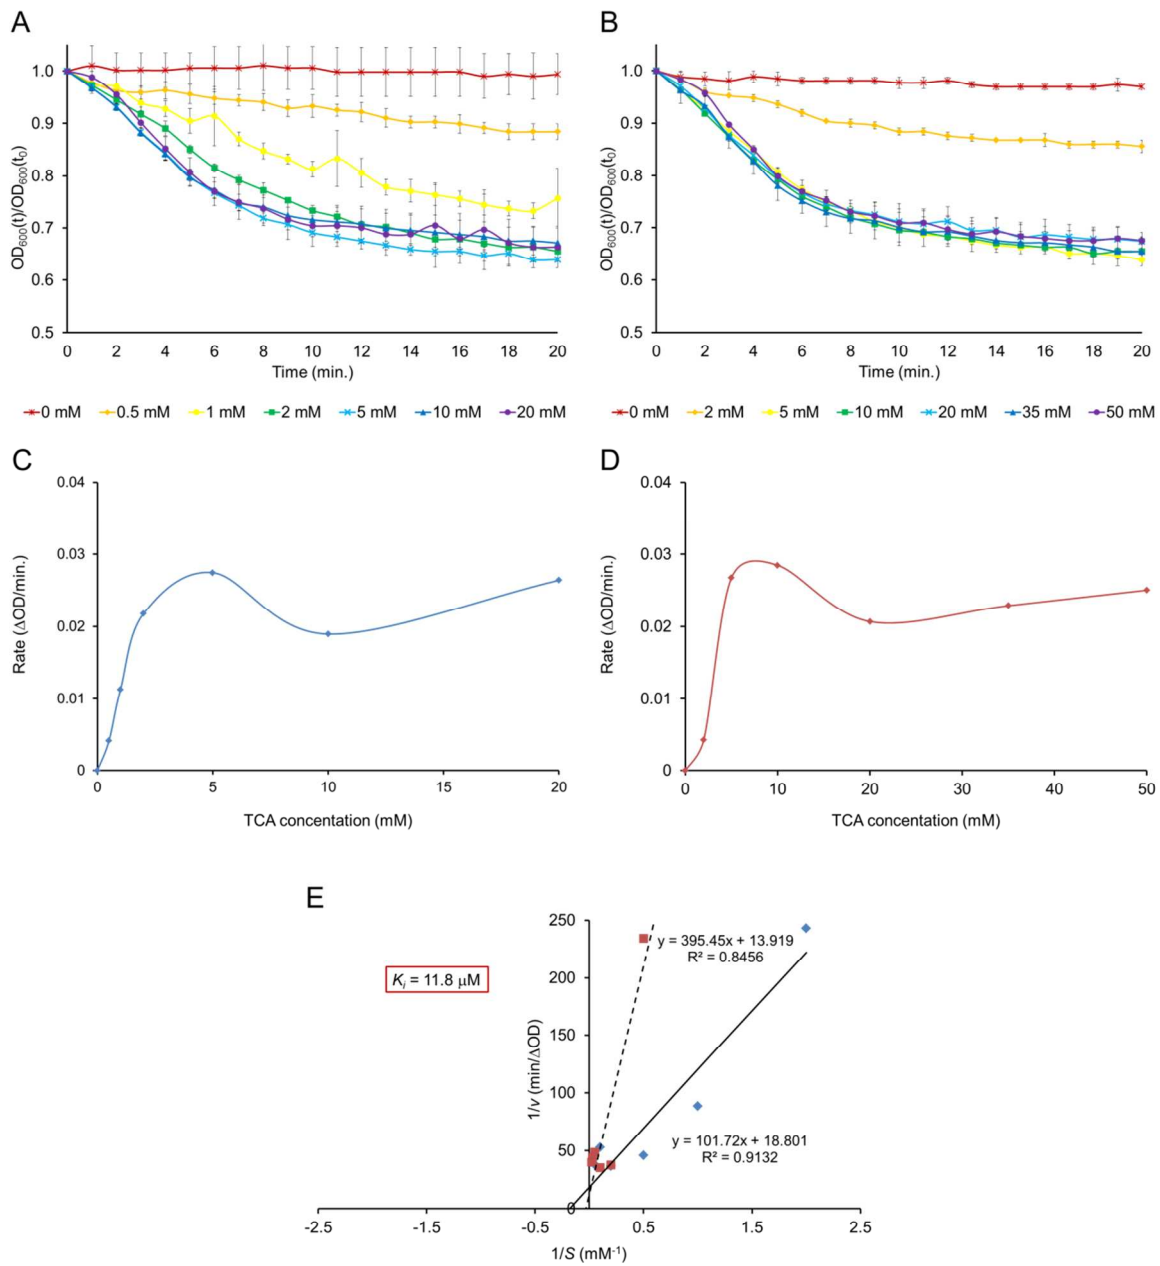

Figure S60c: Experiment 3.

## References

1. Weingarden, A. R.; Chen, C.; Zhang, N.; Graiziger, C. T.; Dosa, P. I.; Steer, C. J.; Shaughnessy, M. K.; Johnson, J. R.; Sadowsky, M. J.; Khoruts, A., Ursodeoxycholic Acid Inhibits *Clostridium difficile* Spore Germination and Vegetative Growth, and Prevents the Recurrence of Ileal Pouchitis Associated With the Infection. *J. Clin. Gastroenterol.* **2016**, *50*, 624-630.
